# Supplementary material for: Calix[4]bipyrrole—a big, flexible, yet effective chloride-selective anion receptor
Source: Royal Society of Chemistry journal article supplement (doi:10.1039/b412737d), 2004-12-08

# **Calix[4]bipyrrole - A big, flexible yet effective chloride-selective anion receptor**

**Jonathan L. Sessler,<sup>\*a</sup> Deqiang An,<sup>a</sup> Won-Seob Cho,<sup>a</sup> Vincent Lynch<sup>a</sup> and Maual Marquez<sup>b</sup>**

<sup>a</sup> *Department of Chemistry and Biochemistry, Institute for Cellular and Molecular Biology,*

*The University of Texas at Austin, 1 University Station - A5300, Austin, TX 78712-0165, USA.*

<sup>b</sup> *Chemical Science and Technology, Los Alamos National Laboratory, Los Alamos, NM 87545, USA*

## **Supporting Information**

### **I. <sup>1</sup>H NMR titration studies**

### **II. ITC titration studies**

### **III. X-ray experimental section**

#### **I. <sup>1</sup>H NMR titration studies**

Proton NMR-based titration studies were carried out using a Varian Unity Plus 400 MHz NMR spectrometer. All anions were used in the form of their tetrabutylammonium salts. Tetrabutylammonium chloride was dried under vacuum at 40°C for 24 h before use. All other reagents were obtained from commercial sources and used without drying or purification. The receptor solutions were titrated by adding known quantities of a concentrated solution of the anions in question. The anion solutions used to effect the titration contained the receptors at the same concentration as the receptor solutions into which they were being titrated so as to obviate a need to account for dilution effects during the titrations. The data were fit to a 1:1 binding

profile according to the method of Wilcox<sup>1</sup> using the changes in the pyrrolic NH resonances in the <sup>1</sup>H NMR spectra.

### <sup>1</sup>H NMR titrations for compound 3 (Figure 1-2)

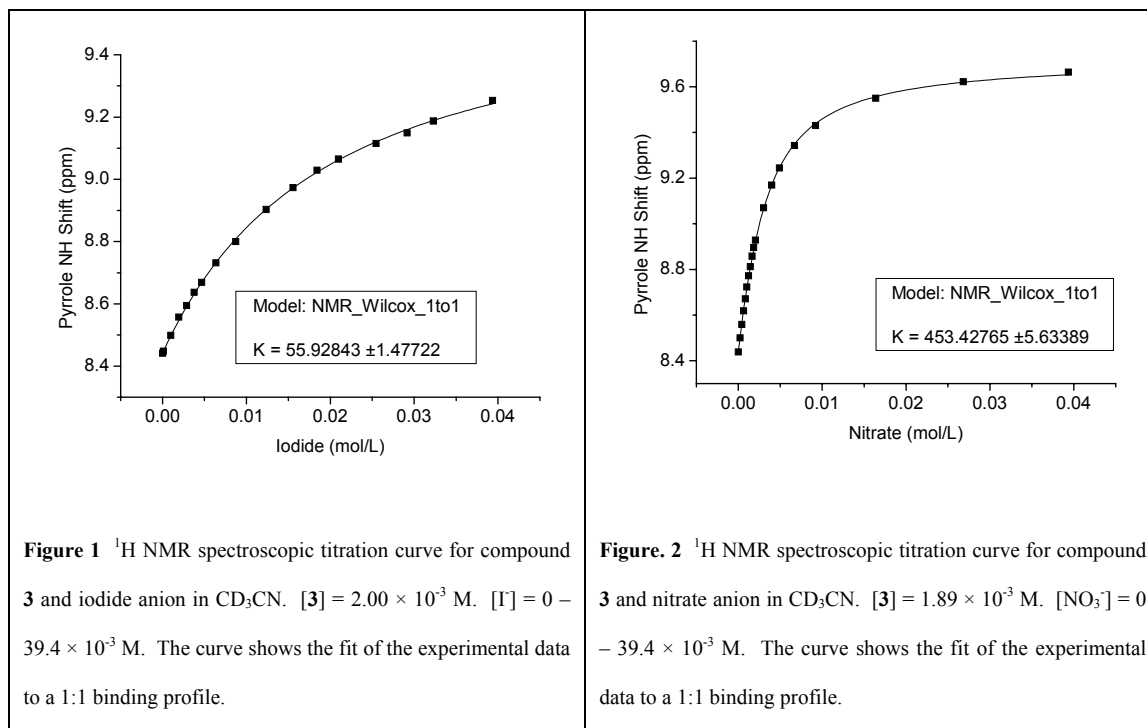

## $^1\text{H}$ NMR titrations for compound 2 and 1 (Figure 3-4)

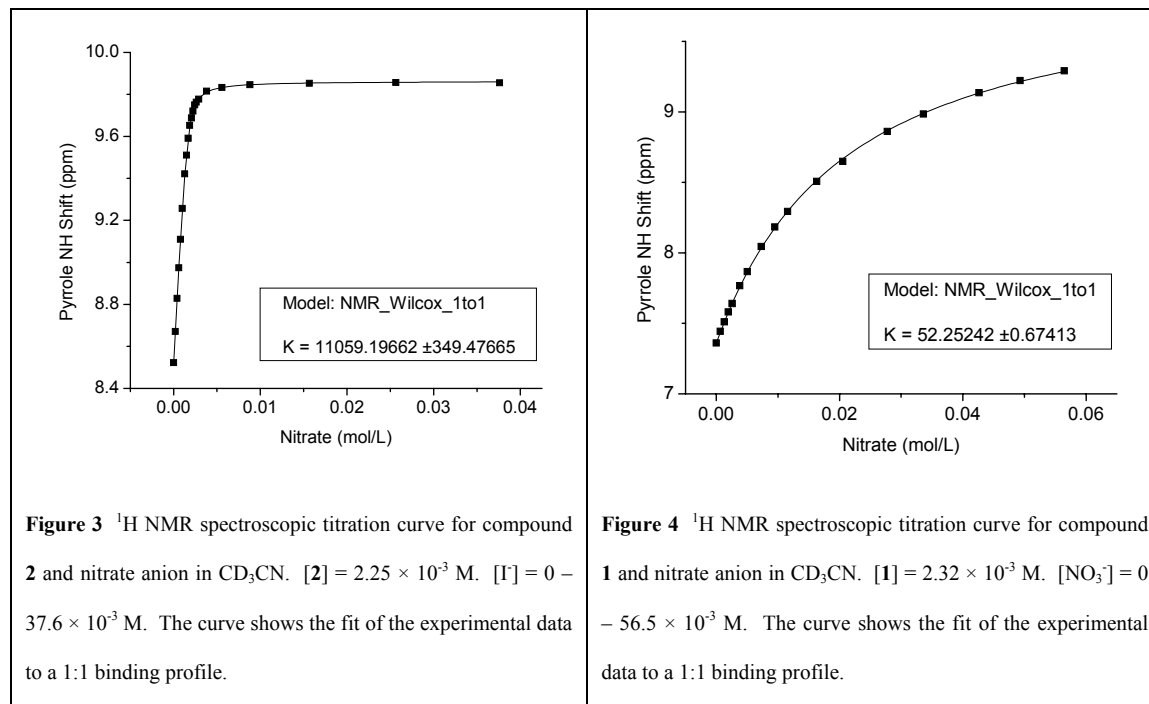

### References:

1. Wilcox, C. S. in *Frontiers in Supramolecular Organic Chemistry and Photochemistry*; Schneider, H. J., Dürr, H., Eds.; VCH: Weinheim, 1991.

## II. ITC titration studies

Microcalorimetric titrations (experimental temperature: 30 °C) were performed using an isothermal titration calorimeter (ITC) purchased from Microcal Inc., MA. The ORIGIN software provided by Microcal Inc. was used to calculate the binding constant ( $K_a$ ) and the enthalpy change ( $\Delta H$ ). The solvent, CH<sub>3</sub>CN, was HPLC grade (Fisher) but was not further dried or purified before use.

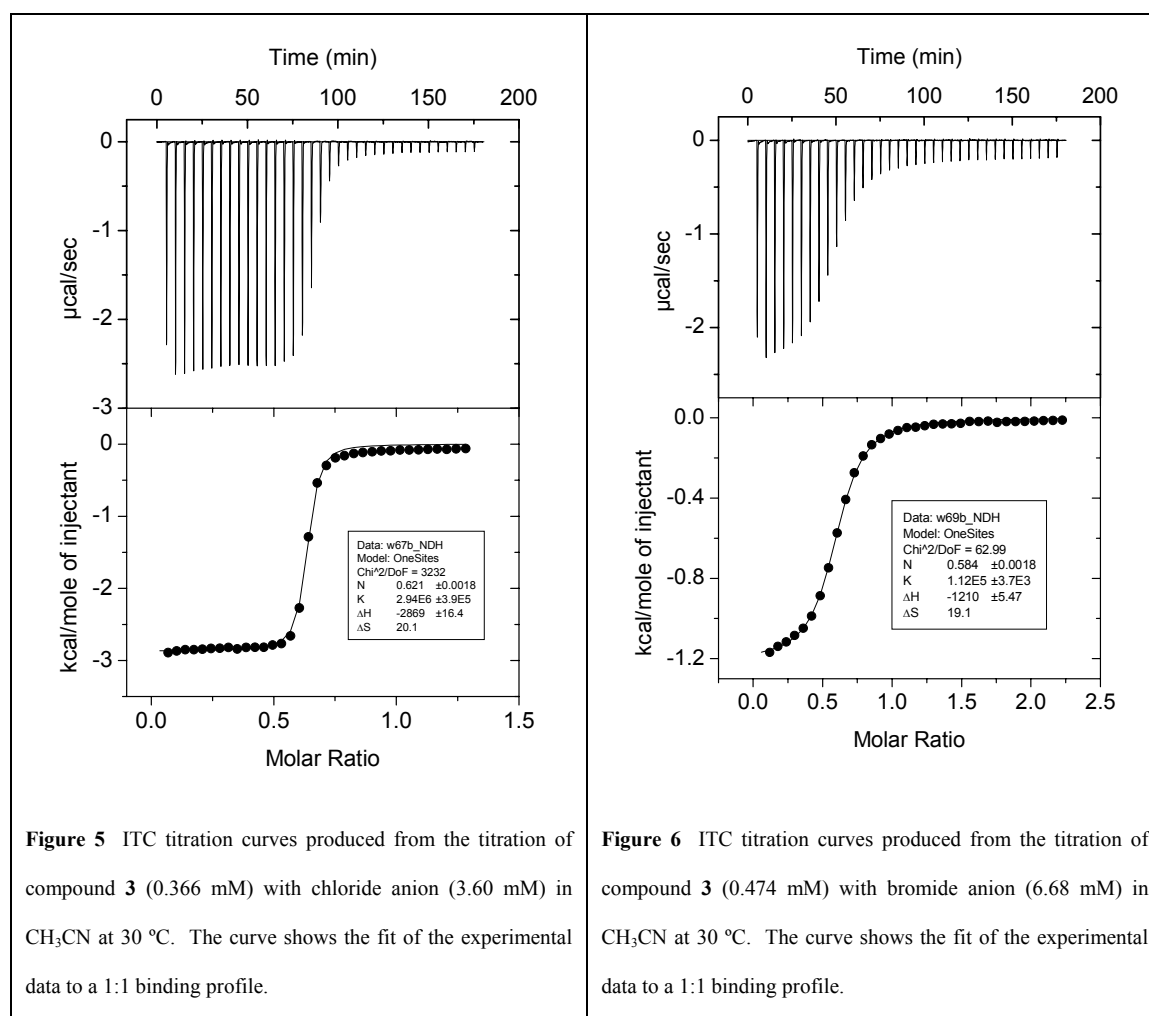

### III. X-ray experimental section

#### Crystallographic Material for 3·Cl<sup>-</sup>:

- X-ray Experimental.
- Table 1. Crystallographic Data for  $3 \cdot C_{16}H_{36}NCl \cdot 2C_4H_{10}O$ .
- Table 2. Fractional coordinates and equivalent isotropic thermal parameters ( $\text{\AA}^2$ ) for the non-hydrogen atoms of  $3 \cdot C_{16}H_{36}NCl \cdot 2C_4H_{10}O$ .
- Table 3. Bond Lengths ( $\text{\AA}$ ) and Angles ( $^\circ$ ) for the non-hydrogen atoms of  $3 \cdot C_{16}H_{36}NCl \cdot 2C_4H_{10}O$ .
- Table 4. Anisotropic thermal parameters for the non-hydrogen atoms of  $3 \cdot C_{16}H_{36}NCl \cdot 2C_4H_{10}O$ .
- Table 5. Fractional coordinates and isotropic thermal parameters ( $\text{\AA}^2$ ) for the hydrogen atoms of  $3 \cdot C_{16}H_{36}NCl \cdot 2C_4H_{10}O$ .
- Table 6. Torsion Angles ( $^\circ$ ) for the non-hydrogen atoms of  $3 \cdot C_{16}H_{36}NCl \cdot 2C_4H_{10}O$ .
- Table 7. Hydrogen Bond Lengths ( $\text{\AA}$ ) and Angles ( $^\circ$ ) for  $3 \cdot C_{16}H_{36}NCl \cdot 2C_4H_{10}O$ .
- Figure 1. View of  $3 \cdot Cl$  showing the atom labeling scheme.
- Figure 2. View illustrating the cation in  $3 \cdot C_{16}H_{36}NCl \cdot 2C_4H_{10}O$ .
- Figure 3. Unit cell packing diagram for  $3 \cdot C_{16}H_{36}NCl \cdot 2C_4H_{10}O$ .

X-ray Experimental for  $3 \cdot C_{16}H_{36}NCl \cdot 2C_4H_{10}O$ :  $C_{68}H_{104}ClN_9O_2$ , crystals grew as large, light brown needles by vapor diffusion of diethyl ether into a dichloromethane solution of **3** and tetrabutylammonium chloride (1:1 molar ratio). The data crystal was cut into an irregular shaped block that had approximate dimensions;  $0.30 \times 0.30 \times 0.15$  mm. The data were collected on a Nonius Kappa CCD diffractometer using a graphite monochromator with  $MoK\alpha$  radiation ( $\lambda = 0.71073 \text{ \AA}$ ). A total of 373 frames of data were collected using  $\omega$ -scans with a scan range of  $1^\circ$  and a counting time of 118 seconds per frame. The data were collected at 153 K using an Oxford Cryostream low temperature device. Details of crystal data, data collection and structure refinement are listed in Table 1. Data reduction were performed using DENZO-SMN.<sup>1</sup> The structure was solved by direct methods using SIR97<sup>2</sup> and refined by full-matrix least-squares on  $F^2$  with anisotropic displacement parameters for the non-H atoms using SHELXL-97.<sup>3</sup> The hydrogen atoms on carbon were calculated in ideal positions with isotropic displacement parameters set to  $1.2 \times U_{eq}$  of the attached atom ( $1.5 \times U_{eq}$  for methyl hydrogen atoms).

Two molecules of diethyl ether were also present in the lattice. These molecules were disordered. The contribution to the scattering due to the solvate molecules was removed by use of the utility SQUEEZE<sup>4</sup> as incorporated in WinGX.<sup>5</sup>

The function,  $\sum w(|F_o|^2 - |F_c|^2)^2$ , was minimized, where  $w = 1/[(\sigma(F_o))^2 + (0.02 \cdot P)^2]$  and  $P = (|F_o|^2 + 2|F_c|^2)/3$ .  $R_w(F^2)$  refined to 0.139, with  $R(F)$  equal to 0.0754 and a goodness of fit,  $S$ , = 1.89. Definitions used for calculating  $R(F)$ ,  $R_w(F^2)$  and the goodness of fit,  $S$ , are given below.<sup>6</sup> The data were corrected for secondary extinction effects. The correction takes the form:  $F_{corr} = kF_c/[1 + (7.1(4) \times 10^{-6}) \cdot F_c^2 \lambda^3/(\sin 2\theta)]^{0.25}$  where  $k$  is the overall scale factor. The absolute structure of the crystal was determined by the method of Flack.<sup>7</sup> The Flack  $x$

parameter refined to 0.10(8) for the reported structure. Neutral atom scattering factors and values used to calculate the linear absorption coefficient are from the International Tables for X-ray Crystallography (1992).<sup>8</sup> All figures were generated using SHELXTL/PC.<sup>9</sup> Tables of positional and thermal parameters, bond lengths and angles, torsion angles, figures and lists of observed and calculated structure factors are located in tables 1 through 7.

## **References**

1. DENZO-SMN. (1997). Z. Otwinowski and W. Minor, *Methods in Enzymology*, **276**: Macromolecular Crystallography, part A, 307 – 326, C. W. Carter, Jr. and R. M. Sweets, Editors, Academic Press.
2. SIR97. (1999). A program for crystal structure solution. Altomare, A., Burla, M. C., Camalli, M., Cascarano, G. L., Giacovazzo, C., Guagliardi, A., Moliterni, A. G. G., Polidori, G. and Spagna, R. *J. Appl. Cryst.* **32**, 115-119.
3. Sheldrick, G. M. (1994). SHELXL97. Program for the Refinement of Crystal Structures. University of Gottingen, Germany.
4. Spek, A. L. (1998). PLATON, A Multipurpose Crystallographic Tool. Utrecht University, The Netherlands.
5. WinGX 1.64. (1999). An Integrated System of Windows Programs for the Solution, Refinement and Analysis of Single Crystal X-ray Diffraction Data. Farrugia, L. J. *J. Appl. Cryst.* **32**. 837-838.
6.  $R_w(F^2) = \{ \sum w(|F_o|^2 - |F_c|^2)^2 / \sum w(|F_o|^4) \}^{1/2}$  where w is the weight given each reflection.  
 $R(F) = \sum (|F_o| - |F_c|) / \sum |F_o|$  for reflections with  $F_o > 4(\sigma(F_o))$ .

$S = [\sum w(|F_o|^2 - |F_c|^2)^2 / (n - p)]^{1/2}$ , where  $n$  is the number of reflections and  $p$  is the number of refined parameters.

7. Flack, H. D. (1983). *Acta Cryst.* A39, 876-881.
8. International Tables for X-ray Crystallography (1992). Vol. C, Tables 4.2.6.8 and 6.1.1.4, A. J. C. Wilson, editor, Boston: Kluwer Academic Press.
9. Sheldrick, G. M. (1994). SHELXTL/PC (Version 5.03). Siemens Analytical X-ray Instruments, Inc., Madison, Wisconsin, USA.



**Table 1.** Crystal data and structure refinement for  $3 \cdot \text{C}_{16}\text{H}_{36}\text{NCl} \cdot 2\text{C}_4\text{H}_{10}\text{O}$ .

|                                   |                                                                   |                       |
|-----------------------------------|-------------------------------------------------------------------|-----------------------|
| Empirical formula                 | C <sub>68</sub> H <sub>104</sub> Cl N <sub>9</sub> O <sub>2</sub> |                       |
| Formula weight                    | 1115.05                                                           |                       |
| Temperature                       | 153(2) K                                                          |                       |
| Wavelength                        | 0.71073 Å                                                         |                       |
| Crystal system                    | Orthorhombic                                                      |                       |
| Space group                       | P212121                                                           |                       |
| Unit cell dimensions              | a = 15.1706(3) Å                                                  | $\alpha = 90^\circ$ . |
|                                   | b = 20.1092(4) Å                                                  | $\beta = 90^\circ$ .  |
|                                   | c = 21.6320(5) Å                                                  | $\gamma = 90^\circ$ . |
| Volume                            | 6599.2(2) Å <sup>3</sup>                                          |                       |
| Z                                 | 4                                                                 |                       |
| Density (calculated)              | 1.122 Mg/m <sup>3</sup>                                           |                       |
| Absorption coefficient            | 0.107 mm <sup>-1</sup>                                            |                       |
| F(000)                            | 2432                                                              |                       |
| Crystal size                      | 0.3 x 0.3 x 0.15 mm                                               |                       |
| Theta range for data collection   | 3.00 to 25.07°.                                                   |                       |
| Index ranges                      | -18 ≤ h ≤ 18, -23 ≤ k ≤ 23, -25 ≤ l ≤ 25                          |                       |
| Reflections collected             | 11343                                                             |                       |
| Independent reflections           | 11343                                                             |                       |
| Completeness to theta = 25.07°    | 98.9 %                                                            |                       |
| Absorption correction             | None                                                              |                       |
| Refinement method                 | Full-matrix least-squares on F <sup>2</sup>                       |                       |
| Data / restraints / parameters    | 11343 / 0 / 633                                                   |                       |
| Goodness-of-fit on F <sup>2</sup> | 1.849                                                             |                       |
| Final R indices [I > 2σ(I)]       | R1 = 0.0754, wR2 = 0.1322                                         |                       |
| R indices (all data)              | R1 = 0.1756, wR2 = 0.1387                                         |                       |
| Absolute structure parameter      | 0.10(8)                                                           |                       |
| Extinction coefficient            | 7.1(4) × 10 <sup>-6</sup>                                         |                       |
| Largest diff. peak and hole       | 0.241 and -0.186 e.Å <sup>-3</sup>                                |                       |

**Table 2.** Atomic coordinates ( $\times 10^4$ ) and equivalent isotropic displacement parameters ( $\text{\AA}^2 \times 10^3$ ) for  $3\cdot\text{C}_{16}\text{H}_{36}\text{NCl}\cdot 2\text{C}_4\text{H}_{10}\text{O}$ .  $U(\text{eq})$  is defined as one third of the trace of the orthogonalized  $U_{ij}$  tensor.

|     | x        | y       | z       | U(eq) |
|-----|----------|---------|---------|-------|
| Cl1 | 2084(1)  | 2698(1) | 2323(1) | 59(1) |
| N1  | 1788(2)  | 3157(2) | 814(2)  | 59(1) |
| N2  | 2275(2)  | 1752(2) | 1007(2) | 54(1) |
| N3  | 1318(3)  | 1079(2) | 2153(2) | 52(1) |
| N4  | 200(3)   | 1945(2) | 2932(2) | 60(1) |
| N5  | 1331(4)  | 2941(2) | 3830(2) | 75(1) |
| N6  | 3301(4)  | 2859(2) | 3675(2) | 84(2) |
| N7  | 4048(3)  | 3657(2) | 2502(2) | 75(1) |
| N8  | 2746(3)  | 4222(2) | 1636(2) | 69(1) |
| C1  | 1541(3)  | 3773(3) | 579(3)  | 59(1) |
| C2  | 1540(3)  | 3712(3) | -58(3)  | 69(2) |
| C3  | 1808(3)  | 3046(2) | -199(3) | 62(1) |
| C4  | 1957(3)  | 2708(3) | 337(2)  | 51(1) |
| C5  | 2214(3)  | 2052(2) | 435(2)  | 50(1) |
| C6  | 2497(3)  | 1570(3) | 22(2)   | 61(1) |
| C7  | 2674(3)  | 979(3)  | 345(3)  | 65(2) |
| C8  | 2533(3)  | 1084(2) | 980(3)  | 67(2) |
| C9  | 2562(3)  | 643(2)  | 1524(2) | 50(1) |
| C10 | 1694(3)  | 577(2)  | 1815(2) | 49(1) |
| C11 | 1093(4)  | 88(2)   | 1811(2) | 62(1) |
| C12 | 320(4)   | 270(2)  | 2141(2) | 60(1) |
| C13 | 474(3)   | 911(2)  | 2356(2) | 51(1) |
| C14 | -41(4)   | 1316(2) | 2749(2) | 52(1) |
| C15 | -865(3)  | 1187(3) | 3018(3) | 75(2) |
| C16 | -1091(4) | 1772(3) | 3380(3) | 77(2) |
| C17 | -447(4)  | 2236(3) | 3321(2) | 66(2) |
| C18 | -291(4)  | 2926(2) | 3585(3) | 77(2) |
| C19 | 460(5)   | 2955(2) | 4024(4) | 75(2) |

|      |          |         |          |        |
|------|----------|---------|----------|--------|
| C20  | 508(6)   | 3009(3) | 4640(4)  | 97(2)  |
| C21  | 1370(7)  | 3028(3) | 4818(3)  | 115(3) |
| C22  | 1913(6)  | 2990(2) | 4304(3)  | 79(2)  |
| C23  | 2841(6)  | 3030(2) | 4229(3)  | 85(2)  |
| C24  | 3489(6)  | 3219(3) | 4644(3)  | 95(2)  |
| C25  | 4296(6)  | 3154(3) | 4337(4)  | 110(2) |
| C26  | 4199(5)  | 2937(3) | 3721(4)  | 87(2)  |
| C27  | 4816(4)  | 2822(3) | 3194(3)  | 85(2)  |
| C28  | 4819(5)  | 3433(3) | 2816(3)  | 88(2)  |
| C29  | 5470(5)  | 3858(4) | 2617(4)  | 118(2) |
| C30  | 5102(6)  | 4343(4) | 2220(4)  | 120(3) |
| C31  | 4240(5)  | 4226(3) | 2148(3)  | 83(2)  |
| C32  | 3553(5)  | 4538(3) | 1790(3)  | 76(2)  |
| C33  | 3501(5)  | 5147(3) | 1488(3)  | 81(2)  |
| C34  | 2707(4)  | 5204(3) | 1135(2)  | 67(2)  |
| C35  | 2270(4)  | 4615(3) | 1242(2)  | 66(2)  |
| C36  | 1382(4)  | 4379(3) | 987(2)   | 68(2)  |
| C37  | 2916(3)  | -57(2)  | 1323(2)  | 72(2)  |
| C38  | 3244(3)  | 936(2)  | 1982(2)  | 68(2)  |
| C39  | -148(3)  | 3423(2) | 3046(2)  | 80(2)  |
| C40  | -1163(4) | 3115(2) | 3919(3)  | 97(2)  |
| C41  | 4535(3)  | 2231(2) | 2827(2)  | 89(2)  |
| C42  | 5719(4)  | 2739(3) | 3462(3)  | 124(2) |
| C43  | 756(3)   | 4190(2) | 1518(2)  | 84(2)  |
| C44  | 954(3)   | 4928(2) | 592(2)   | 84(2)  |
| N1A  | 4611(2)  | 4067(2) | -186(2)  | 58(1)  |
| C1A  | 3769(3)  | 4415(2) | -317(2)  | 64(1)  |
| C2A  | 3739(3)  | 4816(2) | -922(2)  | 70(2)  |
| C3A  | 2900(4)  | 5159(3) | -1001(3) | 78(2)  |
| C4A  | 2813(4)  | 5473(2) | -1639(3) | 89(2)  |
| C5A  | 5358(3)  | 4562(2) | -135(2)  | 66(2)  |
| C6A  | 5284(4)  | 5090(2) | 340(3)   | 80(2)  |
| C7A  | 6107(3)  | 5517(3) | 349(3)   | 79(2)  |
| C8A  | 6072(4)  | 6057(3) | 863(3)   | 106(2) |
| C9A  | 4457(3)  | 3701(2) | 424(2)   | 65(2)  |
| C10A | 5270(3)  | 3312(2) | 673(2)   | 75(2)  |

|      |         |         |          |        |
|------|---------|---------|----------|--------|
| C11A | 5005(4) | 2825(3) | 1169(3)  | 86(2)  |
| C12A | 4526(4) | 2223(3) | 933(3)   | 117(2) |
| C13A | 4848(3) | 3573(3) | -696(2)  | 74(2)  |
| C14A | 4218(4) | 3018(3) | -795(3)  | 112(2) |
| C15A | 4471(4) | 2611(3) | -1355(3) | 114(2) |
| C16A | 3757(7) | 2066(4) | -1465(4) | 222(5) |

---

**Table 3.** Bond lengths [ $\text{\AA}$ ] and angles [ $^\circ$ ] for  $3 \cdot \text{C}_{16}\text{H}_{36}\text{NCl} \cdot 2\text{C}_4\text{H}_{10}\text{O}$ .

|        |          |         |          |
|--------|----------|---------|----------|
| N1-C1  | 1.389(5) | C7-C8   | 1.405(6) |
| N1-C4  | 1.396(5) | C7-H7   | 0.96     |
| N1-H1N | 0.90     | C8-C9   | 1.475(6) |
| N2-C5  | 1.379(5) | C9-C10  | 1.465(6) |
| N2-C8  | 1.400(5) | C9-C38  | 1.548(6) |
| N2-H2N | 0.90     | C9-C37  | 1.568(5) |
| N3-C10 | 1.371(5) | C10-C11 | 1.341(6) |
| N3-C13 | 1.396(5) | C11-C12 | 1.420(6) |
| N3-H3N | 0.90     | C11-H11 | 0.96     |
| N4-C14 | 1.375(5) | C12-C13 | 1.390(5) |
| N4-C17 | 1.419(5) | C12-H12 | 0.96     |
| N4-H4N | 0.90     | C13-C14 | 1.412(6) |
| N5-C22 | 1.358(7) | C14-C15 | 1.403(6) |
| N5-C19 | 1.388(6) | C15-C16 | 1.456(6) |
| N5-H5N | 0.90     | C15-H15 | 0.96     |
| N6-C26 | 1.375(6) | C16-C17 | 1.356(6) |
| N6-C23 | 1.429(7) | C16-H16 | 0.96     |
| N6-H6N | 0.90     | C17-C18 | 1.519(7) |
| N7-C31 | 1.408(6) | C18-C19 | 1.483(8) |
| N7-C28 | 1.425(6) | C18-C39 | 1.552(6) |
| N7-H7N | 0.90     | C18-C40 | 1.555(6) |
| N8-C35 | 1.369(6) | C19-C20 | 1.339(7) |
| N8-C32 | 1.419(7) | C20-C21 | 1.364(8) |
| N8-H8N | 0.90     | C20-H20 | 0.96     |
| C1-C2  | 1.384(6) | C21-C22 | 1.386(8) |
| C1-C36 | 1.524(6) | C21-H21 | 0.96     |
| C2-C3  | 1.431(6) | C22-C23 | 1.420(8) |
| C2-H2  | 0.96     | C23-C24 | 1.383(8) |
| C3-C4  | 1.362(6) | C24-C25 | 1.399(8) |
| C3-H3  | 0.96     | C24-H24 | 0.96     |
| C4-C5  | 1.392(6) | C25-C26 | 1.410(8) |
| C5-C6  | 1.387(6) | C25-H25 | 0.96     |
| C6-C7  | 1.404(6) | C26-C27 | 1.492(8) |
| C6-H6  | 0.96     | C27-C28 | 1.476(8) |

|          |          |           |          |
|----------|----------|-----------|----------|
| C27-C41  | 1.491(7) | C43-H43C  | 0.96     |
| C27-C42  | 1.496(7) | C44-H44A  | 0.96     |
| C28-C29  | 1.375(7) | C44-H44B  | 0.96     |
| C29-C30  | 1.415(8) | C44-H44C  | 0.96     |
| C29-H29  | 0.96     | N1A-C1A   | 1.485(5) |
| C30-C31  | 1.339(7) | N1A-C5A   | 1.512(5) |
| C30-H30  | 0.96     | N1A-C13A  | 1.528(5) |
| C31-C32  | 1.442(7) | N1A-C9A   | 1.530(5) |
| C32-C33  | 1.390(7) | C1A-C2A   | 1.537(6) |
| C33-C34  | 1.430(7) | C1A-H1AA  | 0.96     |
| C33-H33  | 0.96     | C1A-H1AB  | 0.96     |
| C34-C35  | 1.379(6) | C2A-C3A   | 1.458(6) |
| C34-H34  | 0.96     | C2A-H2AA  | 0.96     |
| C35-C36  | 1.531(7) | C2A-H2AB  | 0.96     |
| C36-C44  | 1.539(6) | C3A-C4A   | 1.523(6) |
| C36-C43  | 1.540(6) | C3A-H3AA  | 0.96     |
| C37-H37A | 0.96     | C3A-H3AB  | 0.96     |
| C37-H37B | 0.96     | C4A-H4AA  | 0.96     |
| C37-H37C | 0.96     | C4A-H4AB  | 0.96     |
| C38-H38A | 0.96     | C4A-H4AC  | 0.96     |
| C38-H38B | 0.96     | C5A-C6A   | 1.480(6) |
| C38-H38C | 0.96     | C5A-H5AA  | 0.96     |
| C39-H39A | 0.96     | C5A-H5AB  | 0.96     |
| C39-H39B | 0.96     | C6A-C7A   | 1.516(6) |
| C39-H39C | 0.96     | C6A-H6AA  | 0.96     |
| C40-H40A | 0.96     | C6A-H6AB  | 0.96     |
| C40-H40B | 0.96     | C7A-C8A   | 1.554(6) |
| C40-H40C | 0.96     | C7A-H7AA  | 0.96     |
| C41-H41A | 0.96     | C7A-H7AB  | 0.96     |
| C41-H41B | 0.96     | C8A-H8AA  | 0.96     |
| C41-H41C | 0.96     | C8A-H8AB  | 0.96     |
| C42-H42A | 0.96     | C8A-H8AC  | 0.96     |
| C42-H42B | 0.96     | C9A-C10A  | 1.557(6) |
| C42-H42C | 0.96     | C9A-H9AA  | 0.96     |
| C43-H43A | 0.96     | C9A-H9AB  | 0.96     |
| C43-H43B | 0.96     | C10A-C11A | 1.508(6) |

|            |          |            |          |
|------------|----------|------------|----------|
| C10A-H10A  | 0.96     | C13A-H13B  | 0.96     |
| C10A-H10B  | 0.96     | C14A-C15A  | 1.513(7) |
| C11A-C12A  | 1.502(6) | C14A-H14A  | 0.96     |
| C11A-H11B  | 0.96     | C14A-H14B  | 0.96     |
| C11A-H11C  | 0.96     | C15A-C16A  | 1.559(9) |
| C12A-H12B  | 0.96     | C15A-H15B  | 0.96     |
| C12A-H12C  | 0.96     | C15A-H15C  | 0.96     |
| C12A-H12D  | 0.96     | C16A-H16B  | 0.96     |
| C13A-C14A  | 1.484(6) | C16A-H16C  | 0.96     |
| C13A-H13A  | 0.96     | C16A-H16D  | 0.96     |
| C1-N1-C4   | 110.8(4) | C2-C1-C36  | 130.3(5) |
| C1-N1-H1N  | 124.7    | N1-C1-C36  | 123.0(5) |
| C4-N1-H1N  | 124.5    | C1-C2-C3   | 107.2(5) |
| C5-N2-C8   | 113.7(4) | C1-C2-H2   | 125.0    |
| C5-N2-H2N  | 123.1    | C3-C2-H2   | 127.8    |
| C8-N2-H2N  | 123.2    | C4-C3-C2   | 109.4(5) |
| C10-N3-C13 | 111.8(4) | C4-C3-H3   | 124.7    |
| C10-N3-H3N | 124.2    | C2-C3-H3   | 125.9    |
| C13-N3-H3N | 124.0    | C3-C4-C5   | 130.5(5) |
| C14-N4-C17 | 111.5(4) | C3-C4-N1   | 106.0(4) |
| C14-N4-H4N | 124.2    | C5-C4-N1   | 123.4(5) |
| C17-N4-H4N | 124.4    | N2-C5-C6   | 104.5(4) |
| C22-N5-C19 | 112.9(6) | N2-C5-C4   | 124.9(4) |
| C22-N5-H5N | 123.7    | C6-C5-C4   | 130.5(5) |
| C19-N5-H5N | 123.4    | C5-C6-C7   | 109.2(4) |
| C26-N6-C23 | 113.3(6) | C5-C6-H6   | 125.2    |
| C26-N6-H6N | 123.5    | C7-C6-H6   | 125.5    |
| C23-N6-H6N | 123.2    | C6-C7-C8   | 109.3(4) |
| C31-N7-C28 | 110.3(5) | C6-C7-H7   | 126.1    |
| C31-N7-H7N | 124.7    | C8-C7-H7   | 124.5    |
| C28-N7-H7N | 125.0    | N2-C8-C7   | 103.1(5) |
| C35-N8-C32 | 110.0(5) | N2-C8-C9   | 123.5(5) |
| C35-N8-H8N | 124.8    | C7-C8-C9   | 133.3(5) |
| C32-N8-H8N | 125.2    | C10-C9-C8  | 111.8(4) |
| C2-C1-N1   | 106.6(4) | C10-C9-C38 | 111.1(4) |

|             |          |             |          |
|-------------|----------|-------------|----------|
| C8-C9-C38   | 107.5(4) | N5-C19-C18  | 122.5(6) |
| C10-C9-C37  | 110.2(4) | C19-C20-C21 | 109.7(7) |
| C8-C9-C37   | 109.2(4) | C19-C20-H20 | 125.4    |
| C38-C9-C37  | 106.9(4) | C21-C20-H20 | 124.8    |
| C11-C10-N3  | 105.1(4) | C20-C21-C22 | 109.9(7) |
| C11-C10-C9  | 132.5(5) | C20-C21-H21 | 126.3    |
| N3-C10-C9   | 122.4(5) | C22-C21-H21 | 123.7    |
| C10-C11-C12 | 111.7(4) | N5-C22-C21  | 102.9(7) |
| C10-C11-H11 | 123.8    | N5-C22-C23  | 124.2(7) |
| C12-C11-H11 | 124.5    | C21-C22-C23 | 132.7(8) |
| C13-C12-C11 | 105.6(4) | C24-C23-C22 | 130.2(7) |
| C13-C12-H12 | 126.7    | C24-C23-N6  | 105.3(7) |
| C11-C12-H12 | 127.7    | C22-C23-N6  | 124.5(6) |
| C12-C13-N3  | 105.8(4) | C23-C24-C25 | 106.7(7) |
| C12-C13-C14 | 130.0(5) | C23-C24-H24 | 126.1    |
| N3-C13-C14  | 123.9(4) | C25-C24-H24 | 127.0    |
| N4-C14-C15  | 106.8(5) | C24-C25-C26 | 112.8(7) |
| N4-C14-C13  | 123.8(5) | C24-C25-H25 | 123.8    |
| C15-C14-C13 | 129.4(5) | C26-C25-H25 | 123.4    |
| C14-C15-C16 | 106.4(4) | N6-C26-C25  | 101.9(7) |
| C14-C15-H15 | 125.7    | N6-C26-C27  | 123.3(6) |
| C16-C15-H15 | 127.9    | C25-C26-C27 | 134.8(8) |
| C17-C16-C15 | 109.6(5) | C28-C27-C41 | 111.7(5) |
| C17-C16-H16 | 125.4    | C28-C27-C26 | 107.3(6) |
| C15-C16-H16 | 125.0    | C41-C27-C26 | 110.5(5) |
| C16-C17-N4  | 105.7(4) | C28-C27-C42 | 107.7(6) |
| C16-C17-C18 | 134.8(5) | C41-C27-C42 | 112.2(5) |
| N4-C17-C18  | 119.5(5) | C26-C27-C42 | 107.2(5) |
| C19-C18-C17 | 113.4(5) | C29-C28-N7  | 104.1(6) |
| C19-C18-C39 | 110.4(5) | C29-C28-C27 | 133.9(7) |
| C17-C18-C39 | 109.0(5) | N7-C28-C27  | 121.6(6) |
| C19-C18-C40 | 110.3(5) | C28-C29-C30 | 109.6(6) |
| C17-C18-C40 | 105.4(5) | C28-C29-H29 | 125.9    |
| C39-C18-C40 | 108.1(4) | C30-C29-H29 | 124.4    |
| C20-C19-N5  | 104.5(7) | C31-C30-C29 | 109.6(6) |
| C20-C19-C18 | 133.0(8) | C31-C30-H30 | 124.6    |



|               |          |               |          |
|---------------|----------|---------------|----------|
| C29-C30-H30   | 125.7    | H39A-C39-H39B | 109.5    |
| C30-C31-N7    | 106.3(6) | C18-C39-H39C  | 109.6    |
| C30-C31-C32   | 133.8(7) | H39A-C39-H39C | 109.5    |
| N7-C31-C32    | 119.9(6) | H39B-C39-H39C | 109.5    |
| C33-C32-N8    | 103.6(6) | C18-C40-H40A  | 109.7    |
| C33-C32-C31   | 132.7(7) | C18-C40-H40B  | 109.7    |
| N8-C32-C31    | 123.6(6) | H40A-C40-H40B | 109.5    |
| C32-C33-C34   | 111.8(5) | C18-C40-H40C  | 109.0    |
| C32-C33-H33   | 123.4    | H40A-C40-H40C | 109.5    |
| C34-C33-H33   | 124.8    | H40B-C40-H40C | 109.5    |
| C35-C34-C33   | 104.3(5) | C27-C41-H41A  | 108.9    |
| C35-C34-H34   | 127.4    | C27-C41-H41B  | 108.6    |
| C33-C34-H34   | 128.2    | H41A-C41-H41B | 109.5    |
| N8-C35-C34    | 110.3(5) | C27-C41-H41C  | 111.0    |
| N8-C35-C36    | 120.7(5) | H41A-C41-H41C | 109.5    |
| C34-C35-C36   | 129.0(6) | H41B-C41-H41C | 109.5    |
| C1-C36-C35    | 108.4(4) | C27-C42-H42A  | 111.8    |
| C1-C36-C44    | 108.6(4) | C27-C42-H42B  | 107.4    |
| C35-C36-C44   | 110.4(5) | H42A-C42-H42B | 109.5    |
| C1-C36-C43    | 109.4(4) | C27-C42-H42C  | 109.2    |
| C35-C36-C43   | 110.5(4) | H42A-C42-H42C | 109.5    |
| C44-C36-C43   | 109.4(4) | H42B-C42-H42C | 109.5    |
| C9-C37-H37A   | 110.0    | C36-C43-H43A  | 108.8    |
| C9-C37-H37B   | 109.0    | C36-C43-H43B  | 109.1    |
| H37A-C37-H37B | 109.5    | H43A-C43-H43B | 109.5    |
| C9-C37-H37C   | 109.4    | C36-C43-H43C  | 110.5    |
| H37A-C37-H37C | 109.5    | H43A-C43-H43C | 109.5    |
| H37B-C37-H37C | 109.5    | H43B-C43-H43C | 109.5    |
| C9-C38-H38A   | 109.9    | C36-C44-H44A  | 110.9    |
| C9-C38-H38B   | 108.2    | C36-C44-H44B  | 110.2    |
| H38A-C38-H38B | 109.5    | H44A-C44-H44B | 109.5    |
| C9-C38-H38C   | 110.2    | C36-C44-H44C  | 107.4    |
| H38A-C38-H38C | 109.5    | H44A-C44-H44C | 109.5    |
| H38B-C38-H38C | 109.5    | H44B-C44-H44C | 109.5    |
| C18-C39-H39A  | 108.7    | C1A-N1A-C5A   | 110.3(3) |
| C18-C39-H39B  | 110.1    | C1A-N1A-C13A  | 111.8(4) |

|               |          |                |          |
|---------------|----------|----------------|----------|
| C5A-N1A-C13A  | 107.8(4) | C7A-C6A-H6AA   | 110.2    |
| C1A-N1A-C9A   | 105.1(3) | C5A-C6A-H6AB   | 109.5    |
| C5A-N1A-C9A   | 111.6(4) | C7A-C6A-H6AB   | 110.4    |
| C13A-N1A-C9A  | 110.2(3) | H6AA-C6A-H6AB  | 108.5    |
| N1A-C1A-C2A   | 115.8(4) | C6A-C7A-C8A    | 112.2(5) |
| N1A-C1A-H1AA  | 110.4    | C6A-C7A-H7AA   | 109.8    |
| C2A-C1A-H1AA  | 108.4    | C8A-C7A-H7AA   | 108.8    |
| N1A-C1A-H1AB  | 106.7    | C6A-C7A-H7AB   | 110.0    |
| C2A-C1A-H1AB  | 107.3    | C8A-C7A-H7AB   | 107.8    |
| H1AA-C1A-H1AB | 107.9    | H7AA-C7A-H7AB  | 108.2    |
| C3A-C2A-C1A   | 111.9(4) | C7A-C8A-H8AA   | 112.4    |
| C3A-C2A-H2AA  | 109.2    | C7A-C8A-H8AB   | 107.5    |
| C1A-C2A-H2AA  | 109.7    | H8AA-C8A-H8AB  | 109.5    |
| C3A-C2A-H2AB  | 109.1    | C7A-C8A-H8AC   | 108.5    |
| C1A-C2A-H2AB  | 108.3    | H8AA-C8A-H8AC  | 109.5    |
| H2AA-C2A-H2AB | 108.5    | H8AB-C8A-H8AC  | 109.5    |
| C2A-C3A-C4A   | 112.1(5) | N1A-C9A-C10A   | 114.7(4) |
| C2A-C3A-H3AA  | 109.0    | N1A-C9A-H9AA   | 107.6    |
| C4A-C3A-H3AA  | 110.0    | C10A-C9A-H9AA  | 105.9    |
| C2A-C3A-H3AB  | 108.3    | N1A-C9A-H9AB   | 110.5    |
| C4A-C3A-H3AB  | 109.1    | C10A-C9A-H9AB  | 109.6    |
| H3AA-C3A-H3AB | 108.2    | H9AA-C9A-H9AB  | 108.1    |
| C3A-C4A-H4AA  | 109.9    | C11A-C10A-C9A  | 111.1(4) |
| C3A-C4A-H4AB  | 108.8    | C11A-C10A-H10A | 112.0    |
| H4AA-C4A-H4AB | 109.5    | C9A-C10A-H10A  | 107.1    |
| C3A-C4A-H4AC  | 109.7    | C11A-C10A-H10B | 108.3    |
| H4AA-C4A-H4AC | 109.5    | C9A-C10A-H10B  | 109.6    |
| H4AB-C4A-H4AC | 109.5    | H10A-C10A-H10B | 108.6    |
| C6A-C5A-N1A   | 117.8(4) | C12A-C11A-C10A | 114.2(5) |
| C6A-C5A-H5AA  | 106.8    | C12A-C11A-H11B | 108.3    |
| N1A-C5A-H5AA  | 107.1    | C10A-C11A-H11B | 107.7    |
| C6A-C5A-H5AB  | 108.4    | C12A-C11A-H11C | 109.0    |
| N1A-C5A-H5AB  | 108.4    | C10A-C11A-H11C | 109.3    |
| H5AA-C5A-H5AB | 108.0    | H11B-C11A-H11C | 108.1    |
| C5A-C6A-C7A   | 110.7(5) | C11A-C12A-H12B | 111.2    |
| C5A-C6A-H6AA  | 107.5    | C11A-C12A-H12C | 109.0    |

|                |          |                |          |
|----------------|----------|----------------|----------|
| H12B-C12A-H12C | 109.5    | C15A-C14A-H14B | 107.7    |
| C11A-C12A-H12D | 108.2    | H14A-C14A-H14B | 109.1    |
| H12B-C12A-H12D | 109.5    | C14A-C15A-C16A | 109.0(5) |
| H12C-C12A-H12D | 109.5    | C14A-C15A-H15B | 111.8    |
| C14A-C13A-N1A  | 116.2(4) | C16A-C15A-H15B | 107.3    |
| C14A-C13A-H13A | 110.0    | C14A-C15A-H15C | 107.2    |
| N1A-C13A-H13A  | 109.0    | C16A-C15A-H15C | 112.7    |
| C14A-C13A-H13B | 105.0    | H15B-C15A-H15C | 108.9    |
| N1A-C13A-H13B  | 108.2    | C15A-C16A-H16B | 111.2    |
| H13A-C13A-H13B | 108.2    | C15A-C16A-H16C | 111.2    |
| C13A-C14A-C15A | 111.0(5) | H16B-C16A-H16C | 109.5    |
| C13A-C14A-H14A | 110.8    | C15A-C16A-H16D | 105.9    |
| C15A-C14A-H14A | 111.4    | H16B-C16A-H16D | 109.5    |
| C13A-C14A-H14B | 106.8    | H16C-C16A-H16D | 109.5    |

---

**Table 4.** Anisotropic displacement parameters ( $\text{\AA}^2 \times 10^3$ ) for  $3 \cdot \text{C}_{16}\text{H}_{36}\text{NCl} \cdot 2\text{C}_4\text{H}_{10}\text{O}$ . The anisotropic displacement factor exponent takes the form:  $-2\pi^2 [h^2 a^{*2}U^{11} + \dots + 2 h k a^* b^* U^{12}]$ .

|     | $U^{11}$ | $U^{22}$ | $U^{33}$ | $U^{23}$ | $U^{13}$ | $U^{12}$ |
|-----|----------|----------|----------|----------|----------|----------|
| C11 | 76(1)    | 55(1)    | 45(1)    | 0(1)     | 3(1)     | -9(1)    |
| N1  | 73(3)    | 64(3)    | 38(3)    | 5(3)     | 0(2)     | 3(2)     |
| N2  | 52(3)    | 66(3)    | 44(3)    | -13(2)   | 6(2)     | 4(2)     |
| N3  | 60(3)    | 40(2)    | 55(3)    | 1(2)     | -14(2)   | -15(2)   |
| N4  | 68(3)    | 49(3)    | 62(3)    | 0(2)     | 2(2)     | -12(2)   |
| N5  | 136(5)   | 50(3)    | 37(3)    | -6(2)    | 7(4)     | -7(3)    |
| N6  | 132(5)   | 76(3)    | 45(4)    | 5(3)     | -26(3)   | -25(3)   |
| N7  | 93(4)    | 63(3)    | 68(4)    | 7(3)     | -2(3)    | -27(3)   |
| N8  | 96(4)    | 56(3)    | 53(3)    | -2(2)    | -6(3)    | -7(3)    |
| C1  | 63(4)    | 68(4)    | 47(4)    | 7(3)     | 2(3)     | 15(3)    |
| C2  | 66(4)    | 89(5)    | 51(4)    | 6(3)     | 2(3)     | -8(3)    |
| C3  | 81(4)    | 54(3)    | 51(4)    | -13(3)   | 3(3)     | -10(3)   |
| C4  | 66(3)    | 62(4)    | 25(3)    | -4(3)    | 4(3)     | -15(3)   |
| C5  | 56(3)    | 54(4)    | 41(4)    | 0(3)     | 2(3)     | -6(3)    |
| C6  | 71(4)    | 75(4)    | 38(3)    | -7(3)    | 9(3)     | 0(3)     |
| C7  | 57(3)    | 70(4)    | 69(5)    | -21(3)   | 11(3)    | 2(3)     |
| C8  | 70(4)    | 46(3)    | 85(5)    | -23(3)   | 9(3)     | 19(3)    |
| C9  | 48(4)    | 45(3)    | 57(4)    | 4(3)     | -7(3)    | 3(2)     |
| C10 | 53(4)    | 31(3)    | 62(4)    | -3(3)    | -1(3)    | 8(3)     |
| C11 | 86(4)    | 46(3)    | 54(4)    | -10(3)   | -13(3)   | 4(3)     |
| C12 | 75(4)    | 54(4)    | 51(4)    | 3(3)     | -5(3)    | -5(3)    |
| C13 | 63(4)    | 45(3)    | 44(3)    | 6(3)     | -9(3)    | -3(3)    |
| C14 | 72(4)    | 32(3)    | 53(3)    | 5(3)     | 0(3)     | 10(3)    |
| C15 | 59(4)    | 66(4)    | 100(5)   | 11(3)    | 23(4)    | -2(3)    |
| C16 | 60(4)    | 69(4)    | 101(5)   | 16(4)    | 29(3)    | 2(3)     |
| C17 | 80(4)    | 64(4)    | 54(4)    | 3(3)     | 28(3)    | 8(4)     |
| C18 | 100(5)   | 44(3)    | 86(5)    | -4(3)    | 44(4)    | 16(3)    |
| C19 | 91(6)    | 69(4)    | 66(6)    | -20(3)   | 28(5)    | 3(4)     |
| C20 | 147(7)   | 93(5)    | 50(6)    | -17(4)   | 23(5)    | -1(5)    |

|      |        |        |        |        |        |        |
|------|--------|--------|--------|--------|--------|--------|
| C21  | 185(8) | 110(5) | 51(5)  | 5(4)   | 36(6)  | -52(6) |
| C22  | 116(6) | 78(4)  | 42(5)  | 3(3)   | -5(5)  | -27(4) |
| C23  | 159(8) | 58(4)  | 38(5)  | 1(3)   | -11(6) | -8(4)  |
| C24  | 131(6) | 105(5) | 51(5)  | -2(4)  | -18(5) | -15(5) |
| C25  | 136(7) | 106(5) | 87(6)  | -2(5)  | -58(6) | -26(5) |
| C26  | 88(6)  | 94(5)  | 79(6)  | -2(4)  | -38(5) | -14(4) |
| C27  | 87(5)  | 96(5)  | 71(5)  | 12(4)  | -22(4) | 0(4)   |
| C28  | 101(5) | 85(5)  | 77(5)  | -1(4)  | -32(4) | -26(4) |
| C29  | 116(6) | 120(6) | 116(6) | 12(5)  | -22(5) | -40(6) |
| C30  | 130(7) | 106(6) | 124(7) | 3(5)   | -44(5) | -69(5) |
| C31  | 111(6) | 72(4)  | 64(5)  | -11(4) | -20(4) | -26(4) |
| C32  | 104(6) | 67(5)  | 56(4)  | -8(4)  | 6(4)   | -10(4) |
| C33  | 138(6) | 46(4)  | 60(4)  | -5(3)  | 41(4)  | -21(4) |
| C34  | 84(4)  | 51(4)  | 66(4)  | 9(3)   | 10(4)  | 5(3)   |
| C35  | 90(5)  | 72(4)  | 36(4)  | -13(3) | 8(4)   | 6(4)   |
| C36  | 93(5)  | 65(4)  | 44(4)  | 7(3)   | 6(4)   | 18(3)  |
| C37  | 49(3)  | 59(3)  | 107(5) | -6(3)  | 0(3)   | 14(3)  |
| C38  | 43(3)  | 76(3)  | 85(4)  | 14(3)  | -3(3)  | 4(3)   |
| C39  | 113(5) | 46(3)  | 81(4)  | 9(3)   | 29(3)  | -8(3)  |
| C40  | 115(5) | 62(4)  | 115(5) | -16(3) | 48(4)  | 6(3)   |
| C41  | 97(4)  | 85(4)  | 84(5)  | 6(4)   | -23(4) | 3(3)   |
| C42  | 102(6) | 162(6) | 108(6) | 13(5)  | -31(4) | -10(5) |
| C43  | 97(4)  | 93(4)  | 62(4)  | 2(3)   | 30(4)  | 14(3)  |
| C44  | 112(5) | 76(4)  | 62(4)  | 4(3)   | -2(3)  | 24(3)  |
| N1A  | 36(3)  | 77(3)  | 60(3)  | 9(3)   | 11(2)  | 3(2)   |
| C1A  | 62(4)  | 68(3)  | 61(4)  | 7(3)   | 6(3)   | 7(3)   |
| C2A  | 60(4)  | 75(4)  | 75(4)  | 3(3)   | -14(3) | 2(3)   |
| C3A  | 66(4)  | 85(4)  | 84(5)  | 0(3)   | 4(4)   | 3(3)   |
| C4A  | 90(4)  | 69(4)  | 107(5) | 8(3)   | -20(4) | 2(3)   |
| C5A  | 67(4)  | 76(4)  | 56(4)  | 13(3)  | 4(3)   | 1(3)   |
| C6A  | 99(5)  | 74(4)  | 69(4)  | 18(3)  | 9(4)   | 14(4)  |
| C7A  | 65(4)  | 84(4)  | 88(5)  | 13(4)  | -3(3)  | -20(3) |
| C8A  | 105(5) | 97(5)  | 115(6) | -4(4)  | -11(4) | 5(4)   |
| C9A  | 56(4)  | 73(3)  | 67(4)  | 3(3)   | 16(3)  | 2(3)   |
| C10A | 73(4)  | 80(4)  | 72(4)  | 27(3)  | 10(3)  | 10(3)  |
| C11A | 80(4)  | 96(5)  | 83(5)  | 18(4)  | 27(3)  | 21(4)  |

|      |         |        |        |        |        |        |
|------|---------|--------|--------|--------|--------|--------|
| C12A | 82(5)   | 96(5)  | 174(7) | 15(5)  | -1(4)  | -23(4) |
| C13A | 71(4)   | 89(4)  | 62(4)  | 4(3)   | 19(3)  | 18(3)  |
| C14A | 109(5)  | 113(5) | 113(6) | -39(5) | 42(4)  | -40(4) |
| C15A | 149(6)  | 68(4)  | 127(6) | -25(4) | 46(5)  | -10(4) |
| C16A | 348(13) | 145(7) | 173(9) | -78(6) | 114(9) | -79(8) |

---

**Table 5.** Hydrogen coordinates ( $\times 10^4$ ) and isotropic displacement parameters ( $\text{\AA}^2 \times 10^3$ ) for  $3\cdot\text{C}_{16}\text{H}_{36}\text{NCl}\cdot 2\text{C}_4\text{H}_{10}\text{O}$ .

|      | x     | y    | z    | U(eq) |
|------|-------|------|------|-------|
| H1N  | 1832  | 3060 | 1219 | 70    |
| H2N  | 2157  | 1965 | 1363 | 65    |
| H3N  | 1583  | 1470 | 2234 | 62    |
| H4N  | 703   | 2147 | 2816 | 72    |
| H5N  | 1493  | 2902 | 3431 | 90    |
| H6N  | 3028  | 2715 | 3331 | 101   |
| H7N  | 3514  | 3464 | 2528 | 90    |
| H8N  | 2572  | 3822 | 1776 | 82    |
| H2   | 1391  | 4061 | -342 | 83    |
| H3   | 1893  | 2867 | -606 | 74    |
| H6   | 2547  | 1629 | -417 | 73    |
| H7   | 2887  | 571  | 170  | 79    |
| H11  | 1182  | -335 | 1616 | 74    |
| H12  | -206  | 12   | 2199 | 72    |
| H15  | -1201 | 785  | 2969 | 90    |
| H16  | -1615 | 1821 | 3624 | 92    |
| H20  | 14    | 3052 | 4914 | 116   |
| H21  | 1584  | 3077 | 5234 | 138   |
| H24  | 3394  | 3392 | 5052 | 114   |
| H25  | 4857  | 3224 | 4530 | 132   |
| H29  | 6087  | 3821 | 2710 | 141   |
| H30  | 5409  | 4719 | 2051 | 144   |
| H33  | 3959  | 5476 | 1502 | 98    |
| H34  | 2502  | 5579 | 901  | 80    |
| H37A | 2519  | -256 | 1031 | 108   |
| H37B | 3486  | -4   | 1137 | 108   |
| H37C | 2965  | -338 | 1680 | 108   |
| H38A | 3054  | 1367 | 2120 | 102   |

|      |       |      |       |     |
|------|-------|------|-------|-----|
| H38B | 3289  | 642  | 2329  | 102 |
| H38C | 3810  | 975  | 1786  | 102 |
| H39A | 392   | 3312 | 2839  | 120 |
| H39B | -629  | 3395 | 2758  | 120 |
| H39C | -109  | 3867 | 3206  | 120 |
| H40A | -1268 | 2812 | 4254  | 146 |
| H40B | -1122 | 3560 | 4077  | 146 |
| H40C | -1641 | 3089 | 3629  | 146 |
| H41A | 3943  | 2300 | 2683  | 133 |
| H41B | 4923  | 2186 | 2479  | 133 |
| H41C | 4558  | 1834 | 3073  | 133 |
| H42A | 5763  | 2344 | 3709  | 186 |
| H42B | 6125  | 2712 | 3123  | 186 |
| H42C | 5857  | 3121 | 3711  | 186 |
| H43A | 668   | 4573 | 1777  | 126 |
| H43B | 200   | 4052 | 1349  | 126 |
| H43C | 1001  | 3835 | 1759  | 126 |
| H44A | 849   | 5321 | 834   | 125 |
| H44B | 1328  | 5037 | 248   | 125 |
| H44C | 403   | 4758 | 442   | 125 |
| H1AA | 3618  | 4707 | 18    | 77  |
| H1AB | 3321  | 4079 | -344  | 77  |
| H2AA | 3833  | 4524 | -1267 | 84  |
| H2AB | 4206  | 5137 | -913  | 84  |
| H3AA | 2846  | 5495 | -687  | 94  |
| H3AB | 2433  | 4843 | -944  | 94  |
| H4AA | 2253  | 5691 | -1675 | 133 |
| H4AB | 3277  | 5792 | -1692 | 133 |
| H4AC | 2861  | 5135 | -1950 | 133 |
| H5AA | 5405  | 4782 | -527  | 80  |
| H5AB | 5895  | 4322 | -64   | 80  |
| H6AA | 5205  | 4875 | 732   | 96  |
| H6AB | 4774  | 5358 | 257   | 96  |
| H7AA | 6181  | 5732 | -44   | 95  |
| H7AB | 6616  | 5245 | 425   | 95  |
| H8AA | 6592  | 6329 | 870   | 159 |



|      |      |      |       |     |
|------|------|------|-------|-----|
| H8AB | 5566 | 6331 | 783   | 159 |
| H8AC | 6005 | 5840 | 1255  | 159 |
| H9AA | 4006 | 3374 | 354   | 78  |
| H9AB | 4250 | 4003 | 735   | 78  |
| H10A | 5684 | 3635 | 822   | 90  |
| H10B | 5540 | 3068 | 341   | 90  |
| H11B | 4624 | 3054 | 1453  | 103 |
| H11C | 5520 | 2684 | 1392  | 103 |
| H12B | 4362 | 1932 | 1265  | 176 |
| H12C | 4007 | 2364 | 715   | 176 |
| H12D | 4911 | 1991 | 653   | 176 |
| H13A | 5427 | 3399 | -618  | 89  |
| H13B | 4861 | 3808 | -1082 | 89  |
| H14A | 3625 | 3183 | -827  | 134 |
| H14B | 4260 | 2734 | -439  | 134 |
| H15B | 5024 | 2387 | -1298 | 137 |
| H15C | 4524 | 2913 | -1697 | 137 |
| H16B | 3882 | 1813 | -1831 | 333 |
| H16C | 3712 | 1773 | -1117 | 333 |
| H16D | 3210 | 2300 | -1518 | 333 |

---

**Table 6.** Torsion angles [°] for **3**·C<sub>16</sub>H<sub>36</sub>NCl·2C<sub>4</sub>H<sub>10</sub>O.

|                |           |                 |           |
|----------------|-----------|-----------------|-----------|
| C4-N1-C1-C2    | 0.9(5)    | C8-C9-C10-N3    | -73.0(6)  |
| C4-N1-C1-C36   | -175.3(4) | C38-C9-C10-N3   | 47.1(6)   |
| N1-C1-C2-C3    | -1.1(5)   | C37-C9-C10-N3   | 165.4(4)  |
| C36-C1-C2-C3   | 174.7(5)  | N3-C10-C11-C12  | 0.4(5)    |
| C1-C2-C3-C4    | 0.9(6)    | C9-C10-C11-C12  | -176.9(5) |
| C2-C3-C4-C5    | 179.0(4)  | C10-C11-C12-C13 | 0.0(5)    |
| C2-C3-C4-N1    | -0.3(5)   | C11-C12-C13-N3  | -0.4(5)   |
| C1-N1-C4-C3    | -0.4(5)   | C11-C12-C13-C14 | -174.6(4) |
| C1-N1-C4-C5    | -179.8(4) | C10-N3-C13-C12  | 0.7(5)    |
| C8-N2-C5-C6    | -3.8(5)   | C10-N3-C13-C14  | 175.3(4)  |
| C8-N2-C5-C4    | 178.9(4)  | C17-N4-C14-C15  | 0.4(5)    |
| C3-C4-C5-N2    | -174.6(5) | C17-N4-C14-C13  | 179.4(4)  |
| N1-C4-C5-N2    | 4.6(7)    | C12-C13-C14-N4  | 179.1(4)  |
| C3-C4-C5-C6    | 8.8(9)    | N3-C13-C14-N4   | 5.9(7)    |
| N1-C4-C5-C6    | -172.0(4) | C12-C13-C14-C15 | -2.0(8)   |
| N2-C5-C6-C7    | 3.4(5)    | N3-C13-C14-C15  | -175.3(5) |
| C4-C5-C6-C7    | -179.4(5) | N4-C14-C15-C16  | -1.1(5)   |
| C5-C6-C7-C8    | -2.1(5)   | C13-C14-C15-C16 | 180.0(4)  |
| C5-N2-C8-C7    | 2.5(5)    | C14-C15-C16-C17 | 1.5(6)    |
| C5-N2-C8-C9    | -173.9(4) | C15-C16-C17-N4  | -1.2(6)   |
| C6-C7-C8-N2    | -0.2(5)   | C15-C16-C17-C18 | -178.6(6) |
| C6-C7-C8-C9    | 175.7(5)  | C14-N4-C17-C16  | 0.6(5)    |
| N2-C8-C9-C10   | 60.0(6)   | C14-N4-C17-C18  | 178.4(5)  |
| C7-C8-C9-C10   | -115.2(6) | C16-C17-C18-C19 | 111.6(7)  |
| N2-C8-C9-C38   | -62.2(5)  | N4-C17-C18-C19  | -65.5(6)  |
| C7-C8-C9-C38   | 122.6(6)  | C16-C17-C18-C39 | -125.0(6) |
| N2-C8-C9-C37   | -177.8(4) | N4-C17-C18-C39  | 57.9(7)   |
| C7-C8-C9-C37   | 6.9(7)    | C16-C17-C18-C40 | -9.2(9)   |
| C13-N3-C10-C11 | -0.7(5)   | N4-C17-C18-C40  | 173.7(4)  |
| C13-N3-C10-C9  | 176.9(4)  | C22-N5-C19-C20  | -0.6(6)   |
| C8-C9-C10-C11  | 103.9(6)  | C22-N5-C19-C18  | 178.4(4)  |
| C38-C9-C10-C11 | -136.0(5) | C17-C18-C19-C20 | -106.1(7) |
| C37-C9-C10-C11 | -17.7(7)  | C39-C18-C19-C20 | 131.2(6)  |

|                 |           |                  |           |
|-----------------|-----------|------------------|-----------|
| C40-C18-C19-C20 | 11.8(8)   | C26-C27-C28-N7   | -64.1(7)  |
| C17-C18-C19-N5  | 75.3(6)   | C42-C27-C28-N7   | -179.2(5) |
| C39-C18-C19-N5  | -47.4(6)  | N7-C28-C29-C30   | 2.8(7)    |
| C40-C18-C19-N5  | -166.8(4) | C27-C28-C29-C30  | 175.4(7)  |
| N5-C19-C20-C21  | 0.1(7)    | C28-C29-C30-C31  | -1.8(8)   |
| C18-C19-C20-C21 | -178.7(6) | C29-C30-C31-N7   | 0.0(7)    |
| C19-C20-C21-C22 | 0.3(8)    | C29-C30-C31-C32  | -177.9(6) |
| C19-N5-C22-C21  | 0.8(6)    | C28-N7-C31-C30   | 1.8(6)    |
| C19-N5-C22-C23  | -175.9(5) | C28-N7-C31-C32   | -180.0(5) |
| C20-C21-C22-N5  | -0.6(7)   | C35-N8-C32-C33   | 2.6(5)    |
| C20-C21-C22-C23 | 175.6(6)  | C35-N8-C32-C31   | -173.7(5) |
| N5-C22-C23-C24  | 164.7(5)  | C30-C31-C32-C33  | -14.7(11) |
| C21-C22-C23-C24 | -10.9(11) | N7-C31-C32-C33   | 167.6(5)  |
| N5-C22-C23-N6   | -16.5(8)  | C30-C31-C32-N8   | 160.4(6)  |
| C21-C22-C23-N6  | 167.9(6)  | N7-C31-C32-N8    | -17.2(8)  |
| C26-N6-C23-C24  | -0.6(6)   | N8-C32-C33-C34   | -2.2(6)   |
| C26-N6-C23-C22  | -179.7(5) | C31-C32-C33-C34  | 173.6(6)  |
| C22-C23-C24-C25 | 178.7(5)  | C32-C33-C34-C35  | 1.0(6)    |
| N6-C23-C24-C25  | -0.3(6)   | C32-N8-C35-C34   | -2.2(6)   |
| C23-C24-C25-C26 | 1.1(8)    | C32-N8-C35-C36   | 178.1(4)  |
| C23-N6-C26-C25  | 1.2(6)    | C33-C34-C35-N8   | 0.7(6)    |
| C23-N6-C26-C27  | -176.8(5) | C33-C34-C35-C36  | -179.5(5) |
| C24-C25-C26-N6  | -1.4(7)   | C2-C1-C36-C35    | -104.7(6) |
| C24-C25-C26-C27 | 176.3(6)  | N1-C1-C36-C35    | 70.5(6)   |
| N6-C26-C27-C28  | 82.5(7)   | C2-C1-C36-C44    | 15.3(8)   |
| C25-C26-C27-C28 | -94.8(8)  | N1-C1-C36-C44    | -169.4(4) |
| N6-C26-C27-C41  | -39.4(8)  | C2-C1-C36-C43    | 134.7(5)  |
| C25-C26-C27-C41 | 143.2(7)  | N1-C1-C36-C43    | -50.1(6)  |
| N6-C26-C27-C42  | -162.1(5) | N8-C35-C36-C1    | -64.9(6)  |
| C25-C26-C27-C42 | 20.6(10)  | C34-C35-C36-C1   | 115.4(5)  |
| C31-N7-C28-C29  | -2.8(6)   | N8-C35-C36-C44   | 176.2(4)  |
| C31-N7-C28-C27  | -176.6(5) | C34-C35-C36-C44  | -3.5(7)   |
| C41-C27-C28-C29 | -114.5(8) | N8-C35-C36-C43   | 55.1(6)   |
| C26-C27-C28-C29 | 124.3(8)  | C34-C35-C36-C43  | -124.7(5) |
| C42-C27-C28-C29 | 9.2(10)   | C5A-N1A-C1A-C2A  | 60.9(5)   |
| C41-C27-C28-N7  | 57.1(8)   | C13A-N1A-C1A-C2A | -59.1(5)  |

|                     |           |
|---------------------|-----------|
| C9A-N1A-C1A-C2A     | -178.7(4) |
| N1A-C1A-C2A-C3A     | -177.9(4) |
| C1A-C2A-C3A-C4A     | -171.7(4) |
| C1A-N1A-C5A-C6A     | 58.5(5)   |
| C13A-N1A-C5A-C6A    | -179.1(4) |
| C9A-N1A-C5A-C6A     | -57.9(5)  |
| N1A-C5A-C6A-C7A     | 177.0(4)  |
| C5A-C6A-C7A-C8A     | -177.4(4) |
| C1A-N1A-C9A-C10A    | -178.0(4) |
| C5A-N1A-C9A-C10A    | -58.4(5)  |
| C13A-N1A-C9A-C10A   | 61.4(5)   |
| N1A-C9A-C10A-C11A   | -164.7(4) |
| C9A-C10A-C11A-C12A  | 73.4(6)   |
| C1A-N1A-C13A-C14A   | -62.0(6)  |
| C5A-N1A-C13A-C14A   | 176.6(4)  |
| C9A-N1A-C13A-C14A   | 54.5(6)   |
| N1A-C13A-C14A-C15A  | 173.6(5)  |
| C13A-C14A-C15A-C16A | -176.3(6) |

---

**Table 7.** Hydrogen bonds for  $3 \cdot C_{16}H_{36}NCl \cdot 2C_4H_{10}O$  [ $\text{\AA}$  and  $^\circ$ ].

| D-H...A      | d(D-H) | d(H...A) | d(D...A) | <(DHA) |
|--------------|--------|----------|----------|--------|
| N1-H1N...C11 | 0.90   | 2.53     | 3.422(4) | 173.7  |
| N2-H2N...C11 | 0.90   | 2.55     | 3.436(4) | 169.0  |
| N3-H3N...C11 | 0.90   | 2.59     | 3.475(4) | 167.9  |
| N4-H4N...C11 | 0.90   | 2.60     | 3.491(4) | 171.8  |
| N5-H5N...C11 | 0.90   | 2.59     | 3.488(5) | 173.9  |
| N6-H6N...C11 | 0.90   | 2.61     | 3.475(5) | 161.7  |
| N7-H7N...C11 | 0.90   | 2.70     | 3.572(4) | 163.8  |
| N8-H8N...C11 | 0.90   | 2.66     | 3.551(4) | 173.3  |

**Figure 1.** View of the chloride salt of the macrocycle in  $3 \cdot C_{16}H_{36}NCl \cdot 2C_4H_{10}O$  showing the atom labeling scheme. Displacement ellipsoids are scaled to the 30% probability level. Most hydrogen atoms have been removed for clarity. Dashed lines are indicative of N-H $\cdots$ Cl H-bonding interactions. The geometry of these interactions are listed in Table 7. The N $\cdots$ Cl contacts range from 3.422(4) Å for N1 to 3.572(4)Å for N7.

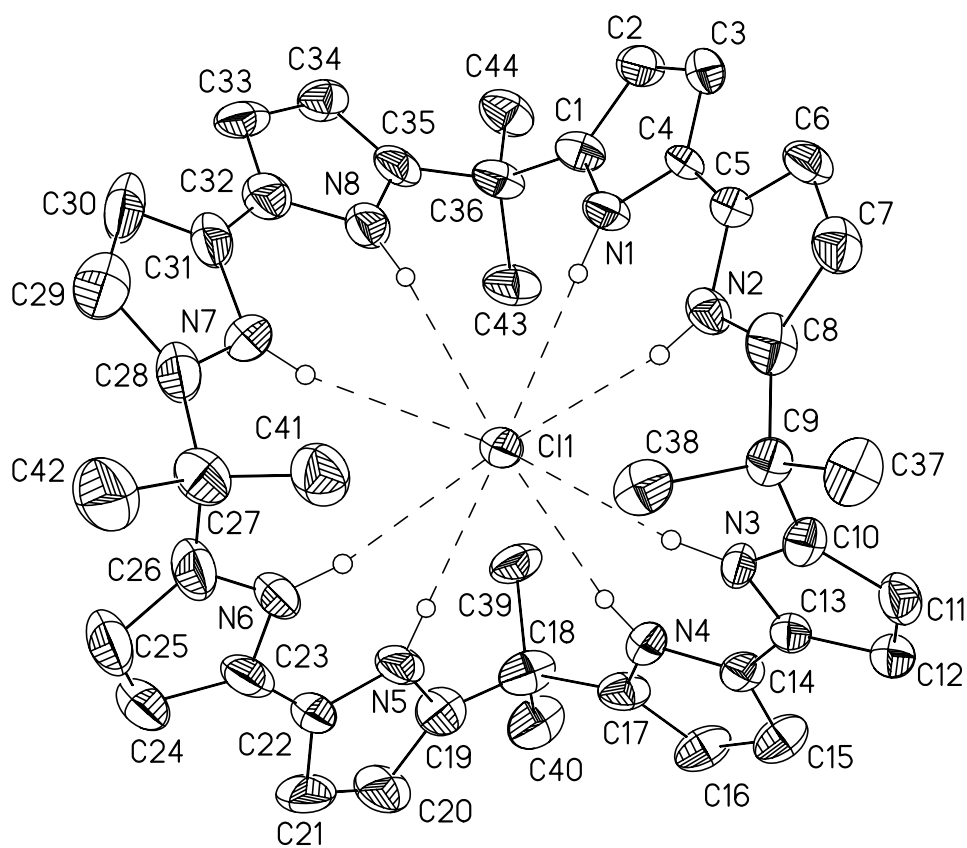

**Figure 2.** View illustrating the cation in  $3 \cdot \text{C}_{16}\text{H}_{36}\text{NCl} \cdot 2\text{C}_4\text{H}_{10}\text{O}$ . Displacement ellipsoids are scaled to the 30% probability level. The hydrogen atoms have been removed for clarity.

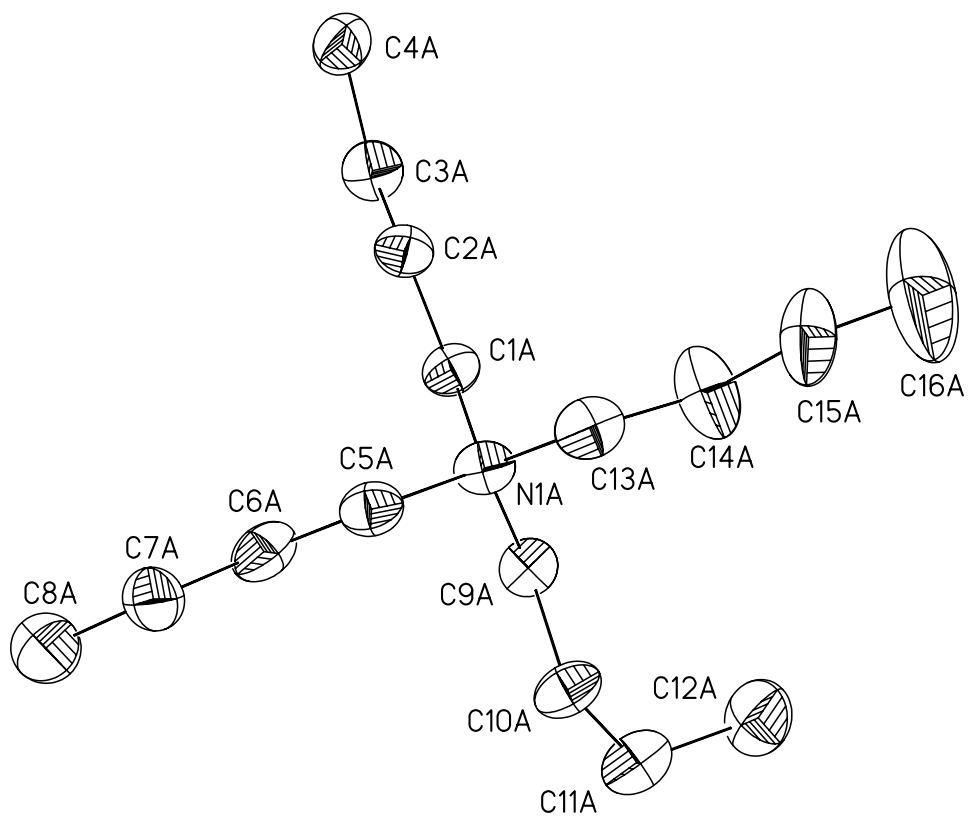

**Figure 3.** Unit cell packing diagram for  $3 \cdot \text{C}_{16}\text{H}_{36}\text{NCl} \cdot 2\text{C}_4\text{H}_{10}\text{O}$ . The view is approximately down the **a** axis.

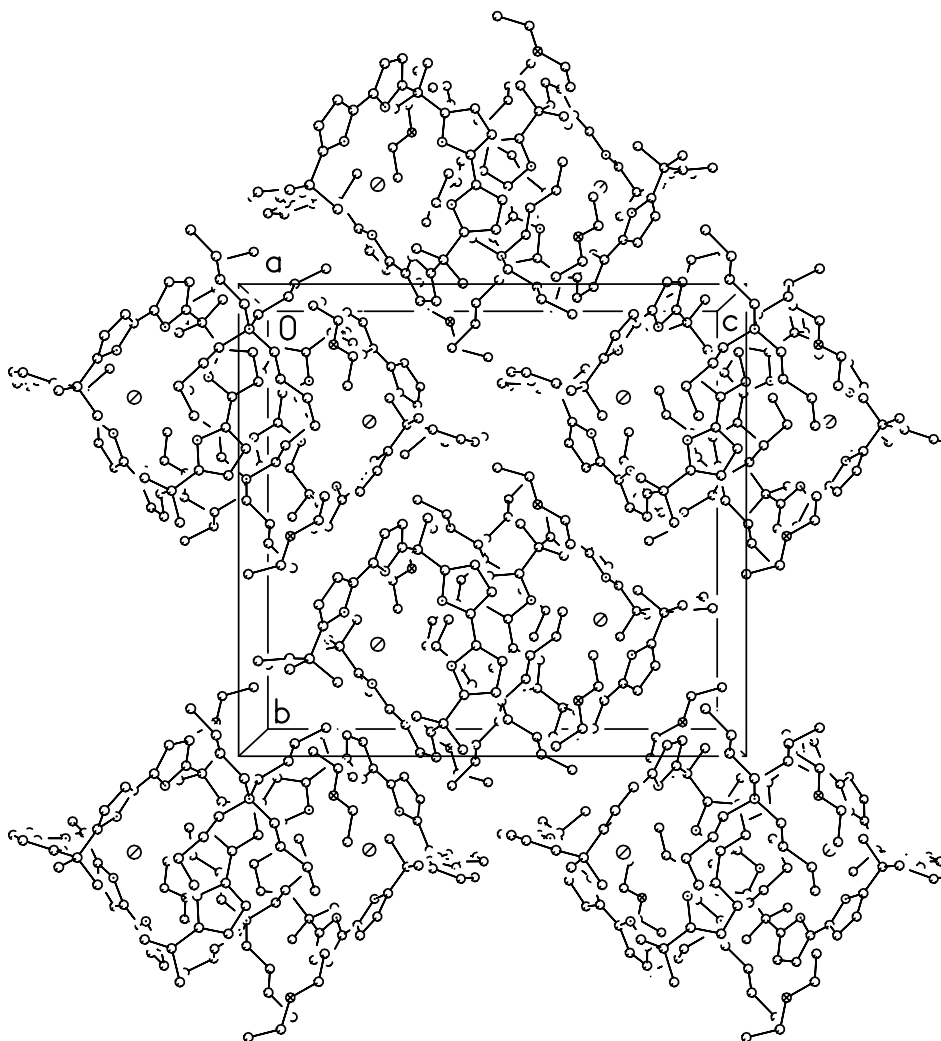



### Crystallographic Material for $\mathbf{3}\cdot\text{Br}^-$ :

- X-ray Experimental.
- Table 1. Crystallographic Data for  $2[\mathbf{3}\cdot\text{C}_8\text{H}_{20}\text{NBr}]\cdot\text{CH}_2\text{Cl}_2$ .
- Table 2. Fractional coordinates and equivalent isotropic thermal parameters ( $\text{\AA}^2$ ) for the non-hydrogen atoms of  $2[\mathbf{3}\cdot\text{C}_8\text{H}_{20}\text{NBr}]\cdot\text{CH}_2\text{Cl}_2$ .
- Table 3. Bond Lengths ( $\text{\AA}$ ) and Angles ( $^\circ$ ) for the non-hydrogen atoms of  $2[\mathbf{3}\cdot\text{C}_8\text{H}_{20}\text{NBr}]\cdot\text{CH}_2\text{Cl}_2$ .
- Table 4. Anisotropic thermal parameters for the non-hydrogen atoms of  $2[\mathbf{3}\cdot\text{C}_8\text{H}_{20}\text{NBr}]\cdot\text{CH}_2\text{Cl}_2$ .
- Table 5. Fractional coordinates and isotropic thermal parameters ( $\text{\AA}^2$ ) for the hydrogen atoms of  $2[\mathbf{3}\cdot\text{C}_8\text{H}_{20}\text{NBr}]\cdot\text{CH}_2\text{Cl}_2$ .
- Table 6. Torsion Angles ( $^\circ$ ) for the non-hydrogen atoms of  $2[\mathbf{3}\cdot\text{C}_8\text{H}_{20}\text{NBr}]\cdot\text{CH}_2\text{Cl}_2$ .
- Table 7. Hydrogen Bond Lengths ( $\text{\AA}$ ) and Angles ( $^\circ$ ) for  $2[\mathbf{3}\cdot\text{C}_8\text{H}_{20}\text{NBr}]\cdot\text{CH}_2\text{Cl}_2$ .
- Figure 1. View of the macrocycle-Br complex 1 in  $2[\mathbf{3}\cdot\text{C}_8\text{H}_{20}\text{NBr}]\cdot\text{CH}_2\text{Cl}_2$  showing the atom labeling scheme.
- Figure 2. View of the macrocycle-Br complex 2 in  $2[\mathbf{3}\cdot\text{C}_8\text{H}_{20}\text{NBr}]\cdot\text{CH}_2\text{Cl}_2$  showing the atom labeling scheme.
- Figure 3. View of one cation with atom labeling scheme
- Figure 4. View of one cation with atom labeling scheme.
- Figure 5. Unit cell packing diagram for  $2[\mathbf{3}\cdot\text{C}_8\text{H}_{20}\text{NBr}]\cdot\text{CH}_2\text{Cl}_2$ .

X-ray Experimental for  $2[\mathbf{3}\cdot\text{C}_8\text{H}_{20}\text{NBr}]\cdot\text{CH}_2\text{Cl}_2$ :  $\text{C}_{52.50}\text{H}_{69}\text{BrClN}_9$ , crystals grew as pale yellow needles by slow evaporation of a dichloromethane solution containing **3** and tetraethylammonium bromide (1:1 molar ratio). The data crystal was a needle that had approximate dimensions;  $0.51 \times 0.11 \times 0.05$  mm. The data were collected on a Nonius Kappa CCD diffractometer using a graphite monochromator with  $\text{MoK}\alpha$  radiation ( $\lambda = 0.71073\text{\AA}$ ). A total of 321 frames of data were collected using  $\omega$ -scans with a scan range of  $0.7^\circ$  and a counting time of 172 seconds per frame. The data were collected at 153 K using an Oxford Cryostream low temperature device. Details of crystal data, data collection and structure refinement are listed in Table 1. Data reduction were performed using DENZO-SMN.<sup>1</sup> The structure was solved by direct methods using SIR97<sup>2</sup> and refined by full-matrix least-squares on  $F^2$  with anisotropic displacement parameters for the non-H atoms using SHELXL-97.<sup>3</sup> The hydrogen atoms were calculated in ideal positions with isotropic displacement parameters set to  $1.2xU_{eq}$  of the attached atom ( $1.5xU_{eq}$  for methyl hydrogen atoms).

The methylene groups of one of the tetraethyl ammonium ion were disordered. The disorder consisted of an inversion at the nitrogen atom of the methylene carbon atoms. The methyl groups appeared not to be involved in the disorder. The cation was modeled by assigning a variable,  $x$ , to the site occupancy factors for one set of four methylene atoms and  $(1-x)$  to the site occupancy factors for the second set of atoms. The site occupancy factors were refined while refining a common isotropic displacement parameter for the 8 methylene carbon atoms in the cation. The geometry at the methylene carbon atoms was restrained to be equal for the 8 atoms throughout refinement. In this way, the site occupancy factors for the major component of the disorder refined to 60(2)%.

The function,  $\sum w(|F_o|^2 - |F_c|^2)^2$ , was minimized, where  $w = 1/[(\sigma(F_o))^2 + (0.0209*P)^2 + (3.4021*P)]$  and  $P = (|F_o|^2 + 2|F_c|^2)/3$ .  $R_w(F^2)$  refined to 0.114, with  $R(F)$  equal to 0.0647 and a goodness of fit,  $S$ , = 1.11. Definitions used for calculating  $R(F)$ ,  $R_w(F^2)$  and the goodness of fit,  $S$ , are given below.<sup>4</sup> The data were checked for secondary extinction effects but no correction was necessary. Neutral atom scattering factors and values used to calculate the linear absorption coefficient are from the International Tables for X-ray Crystallography (1992).<sup>5</sup> All figures were generated using SHELXTL/PC.<sup>6</sup> Tables of positional and thermal parameters, bond lengths and angles, torsion angles, figures and lists of observed and calculated structure factors are located in tables 1 through 8.

## **References**

1. DENZO-SMN. (1997). Z. Otwinowski and W. Minor, *Methods in Enzymology*, **276**: Macromolecular Crystallography, part A, 307 – 326, C. W. Carter, Jr. and R. M. Sweets, Editors, Academic Press.
2. SIR97. (1999). A program for crystal structure solution. Altomare A., Burla M.C., Camalli M., Cascarano G.L., Giacovazzo C. , Guagliardi A., Moliterni A.G.G., Polidori G., Spagna R. *J. Appl. Cryst.* 32, 115-119.
3. Sheldrick, G. M. (1994). SHELXL97. Program for the Refinement of Crystal Structures. University of Gottingen, Germany.
4.  $R_w(F^2) = \{\sum w(|F_o|^2 - |F_c|^2)^2 / \sum w(|F_o|^4)\}^{1/2}$  where  $w$  is the weight given each reflection.  
 $R(F) = \sum(|F_o| - |F_c|) / \sum |F_o|$  for reflections with  $F_o > 4(\sigma(F_o))$ .

$S = [\sum w(|F_o|^2 - |F_c|^2)^2 / (n - p)]^{1/2}$ , where  $n$  is the number of reflections and  $p$  is the number of refined parameters.

5. International Tables for X-ray Crystallography (1992). Vol. C, Tables 4.2.6.8 and 6.1.1.4, A. J. C. Wilson, editor, Boston: Kluwer Academic Press.
6. Sheldrick, G. M. (1994). SHELXTL/PC (Version 5.03). Siemens Analytical X-ray Instruments, Inc., Madison, Wisconsin, USA.

**Table 1.** Crystal data and structure refinement for  $2[\mathbf{3} \cdot \text{C}_8\text{H}_{20}\text{NBr}] \cdot \text{CH}_2\text{Cl}_2$ .

|                                   |                                                   |                             |
|-----------------------------------|---------------------------------------------------|-----------------------------|
| Empirical formula                 | C52.50 H69 Br Cl N9                               |                             |
| Formula weight                    | 941.53                                            |                             |
| Temperature                       | 153(2) K                                          |                             |
| Wavelength                        | 0.71073 Å                                         |                             |
| Crystal system                    | Monoclinic                                        |                             |
| Space group                       | P21/c                                             |                             |
| Unit cell dimensions              | a = 21.4853(3) Å                                  | $\alpha = 90^\circ$ .       |
|                                   | b = 15.7904(2) Å                                  | $\beta = 91.265(1)^\circ$ . |
|                                   | c = 29.3770(5) Å                                  | $\gamma = 90^\circ$ .       |
| Volume                            | 9964.1(3) Å <sup>3</sup>                          |                             |
| Z                                 | 8                                                 |                             |
| Density (calculated)              | 1.255 Mg/m <sup>3</sup>                           |                             |
| Absorption coefficient            | 0.923 mm <sup>-1</sup>                            |                             |
| F(000)                            | 3992                                              |                             |
| Crystal size                      | 0.50 × 0.11 × 0.05 mm                             |                             |
| Theta range for data collection   | 2.91 to 25.00°.                                   |                             |
| Index ranges                      | -25 ≤ h ≤ 25, -18 ≤ k ≤ 18, -34 ≤ l ≤ 34          |                             |
| Reflections collected             | 31386                                             |                             |
| Independent reflections           | 17418 [R(int) = 0.1174]                           |                             |
| Completeness to theta = 25.00°    | 99.2 %                                            |                             |
| Absorption correction             | None                                              |                             |
| Refinement method                 | Full-matrix-block least-squares on F <sup>2</sup> |                             |
| Data / restraints / parameters    | 17418 / 128 / 1180                                |                             |
| Goodness-of-fit on F <sup>2</sup> | 1.090                                             |                             |
| Final R indices [I > 2σ(I)]       | R1 = 0.0647, wR2 = 0.0916                         |                             |
| R indices (all data)              | R1 = 0.1693, wR2 = 0.1145                         |                             |
| Largest diff. peak and hole       | 0.485 and -0.567 e.Å <sup>-3</sup>                |                             |

**Table 2.** Atomic coordinates ( $\times 10^4$ ) and equivalent isotropic displacement parameters ( $\text{\AA}^2 \times 10^3$ ) for  $2[\mathbf{3}\cdot\text{C}_8\text{H}_{20}\text{NBr}]\cdot\text{CH}_2\text{Cl}_2$ .  $U(\text{eq})$  is defined as one third of the trace of the orthogonalized  $U^{ij}$  tensor.

|      | x        | y       | z       | $U(\text{eq})$ |
|------|----------|---------|---------|----------------|
| Br1  | 10429(1) | 2882(1) | 1010(1) | 26(1)          |
| Cl1C | 9495(1)  | 3067(1) | 2142(1) | 44(1)          |
| Cl2C | 9359(1)  | 2186(1) | 2992(1) | 73(1)          |
| N1   | 10656(2) | 1391(2) | 1876(1) | 28(1)          |
| N2   | 11141(2) | 3099(2) | 2092(1) | 28(1)          |
| N3   | 11803(2) | 4026(2) | 1236(1) | 29(1)          |
| N4   | 11764(2) | 3081(2) | 362(1)  | 27(1)          |
| N5   | 10457(2) | 3250(2) | -184(1) | 31(1)          |
| N6   | 9410(2)  | 4066(2) | 291(1)  | 26(1)          |
| N7   | 8759(2)  | 2995(2) | 1101(1) | 26(1)          |
| N8   | 9314(2)  | 1324(2) | 1301(1) | 27(1)          |
| C1   | 10411(2) | 584(3)  | 1884(2) | 31(1)          |
| C2   | 10496(2) | 304(3)  | 2322(2) | 38(1)          |
| C3   | 10787(2) | 942(3)  | 2581(2) | 40(1)          |
| C4   | 10887(2) | 1618(3) | 2299(2) | 30(1)          |
| C5   | 11168(2) | 2439(3) | 2394(2) | 30(1)          |
| C6   | 11500(2) | 2715(3) | 2772(2) | 43(1)          |
| C7   | 11665(2) | 3562(3) | 2692(2) | 46(2)          |
| C8   | 11441(2) | 3799(3) | 2268(2) | 35(1)          |
| C9   | 11499(2) | 4616(3) | 1999(2) | 37(1)          |
| C10  | 11950(2) | 4492(3) | 1614(2) | 32(1)          |
| C11  | 12556(2) | 4745(4) | 1566(2) | 52(2)          |
| C12  | 12771(2) | 4428(3) | 1151(2) | 50(2)          |
| C13  | 12296(2) | 3977(3) | 943(2)  | 29(1)          |
| C14  | 12261(2) | 3566(3) | 503(2)  | 28(1)          |
| C15  | 12667(2) | 3588(3) | 146(2)  | 37(1)          |
| C16  | 12403(2) | 3116(3) | -212(2) | 34(1)          |
| C17  | 11841(2) | 2796(3) | -79(2)  | 29(1)          |

|      |          |         |         |       |
|------|----------|---------|---------|-------|
| C18  | 11360(2) | 2261(3) | -324(2) | 34(1) |
| C19  | 10803(2) | 2790(3) | -486(2) | 28(1) |
| C20  | 10514(2) | 2883(3) | -901(2) | 34(1) |
| C21  | 9991(2)  | 3403(3) | -853(2) | 35(1) |
| C22  | 9963(2)  | 3637(3) | -407(2) | 25(1) |
| C23  | 9506(2)  | 4146(3) | -171(2) | 25(1) |
| C24  | 9059(2)  | 4691(3) | -335(2) | 30(1) |
| C25  | 8688(2)  | 4940(3) | 29(2)   | 33(1) |
| C26  | 8906(2)  | 4549(3) | 418(2)  | 28(1) |
| C27  | 8670(2)  | 4538(3) | 899(2)  | 30(1) |
| C28  | 8388(2)  | 3676(3) | 988(2)  | 27(1) |
| C29  | 7796(2)  | 3370(3) | 958(2)  | 34(1) |
| C30  | 7804(2)  | 2500(3) | 1059(2) | 31(1) |
| C31  | 8407(2)  | 2271(3) | 1154(2) | 24(1) |
| C32  | 8684(2)  | 1459(3) | 1273(2) | 25(1) |
| C33  | 8411(2)  | 701(3)  | 1365(2) | 42(2) |
| C34  | 8888(2)  | 100(3)  | 1450(2) | 50(2) |
| C35  | 9449(2)  | 493(3)  | 1407(2) | 32(1) |
| C36  | 10111(2) | 176(3)  | 1470(2) | 36(1) |
| C37  | 11750(2) | 5308(3) | 2316(2) | 51(2) |
| C38  | 10861(2) | 4889(3) | 1804(2) | 37(1) |
| C39  | 11131(2) | 1544(3) | -11(2)  | 42(2) |
| C40  | 11661(2) | 1859(3) | -745(2) | 54(2) |
| C41  | 9186(2)  | 4730(3) | 1250(2) | 39(1) |
| C42  | 8151(2)  | 5219(3) | 940(2)  | 50(2) |
| C43  | 10486(2) | 358(3)  | 1037(2) | 40(1) |
| C44  | 10093(2) | -795(3) | 1542(2) | 54(2) |
| N1B  | 8252(2)  | 3048(3) | 4636(1) | 40(1) |
| C1B  | 8184(3)  | 2144(4) | 4780(3) | 46(2) |
| C1BA | 7602(4)  | 2670(6) | 4702(6) | 40(5) |
| C2B  | 7548(2)  | 1757(4) | 4717(2) | 69(2) |
| C3B  | 8947(3)  | 3308(5) | 4670(2) | 46(2) |
| C3BA | 8684(5)  | 2774(7) | 5022(4) | 23(4) |
| C4B  | 9250(2)  | 3292(4) | 5111(2) | 67(2) |
| C5B  | 7896(3)  | 3615(4) | 4971(2) | 45(2) |
| C5BA | 8094(8)  | 3962(6) | 4534(4) | 49(5) |

|      |         |          |         |        |
|------|---------|----------|---------|--------|
| C6B  | 7966(3) | 4523(4)  | 4925(2) | 75(2)  |
| C7B  | 8044(3) | 3267(5)  | 4158(2) | 56(2)  |
| C7BA | 8497(8) | 2480(10) | 4258(3) | 64(6)  |
| C8B  | 8278(4) | 2683(5)  | 3802(2) | 114(3) |
| Br2  | 5727(1) | 3748(1)  | 3690(1) | 28(1)  |
| N1'  | 6757(2) | 5309(2)  | 4035(1) | 26(1)  |
| N2'  | 7158(2) | 4218(2)  | 3259(1) | 23(1)  |
| N3'  | 6081(2) | 3761(2)  | 2513(1) | 28(1)  |
| N4'  | 4879(2) | 4515(2)  | 2730(1) | 33(1)  |
| N5'  | 4134(2) | 3636(3)  | 3571(1) | 35(1)  |
| N6'  | 4737(2) | 2132(3)  | 3987(1) | 40(1)  |
| N7'  | 5891(2) | 2505(2)  | 4690(2) | 35(1)  |
| N8'  | 6050(2) | 4341(2)  | 4848(1) | 30(1)  |
| C1'  | 6703(2) | 5904(3)  | 4374(2) | 27(1)  |
| C2'  | 7226(2) | 6395(3)  | 4360(2) | 33(1)  |
| C3'  | 7603(2) | 6094(3)  | 4009(2) | 33(1)  |
| C4'  | 7309(2) | 5411(3)  | 3809(2) | 24(1)  |
| C5'  | 7494(2) | 4906(3)  | 3421(2) | 22(1)  |
| C6'  | 7992(2) | 4992(3)  | 3148(2) | 33(1)  |
| C7'  | 7960(2) | 4348(3)  | 2813(2) | 35(1)  |
| C8'  | 7439(2) | 3870(3)  | 2887(2) | 26(1)  |
| C9'  | 7152(2) | 3146(3)  | 2617(2) | 29(1)  |
| C10' | 6622(2) | 3470(3)  | 2323(2) | 31(1)  |
| C11' | 6549(2) | 3590(4)  | 1867(2) | 49(2)  |
| C12' | 5964(2) | 3953(4)  | 1780(2) | 51(2)  |
| C13' | 5675(2) | 4058(3)  | 2186(2) | 31(1)  |
| C14' | 5074(2) | 4421(3)  | 2292(2) | 32(1)  |
| C15' | 4603(2) | 4724(3)  | 2017(2) | 48(2)  |
| C16' | 4121(2) | 5007(3)  | 2297(2) | 48(2)  |
| C17' | 4293(2) | 4884(3)  | 2740(2) | 34(1)  |
| C18' | 3977(2) | 5054(3)  | 3184(2) | 38(1)  |
| C19' | 3737(2) | 4234(3)  | 3381(2) | 37(1)  |
| C20' | 3151(2) | 3898(4)  | 3402(2) | 54(2)  |
| C21' | 3194(2) | 3086(4)  | 3599(2) | 53(2)  |
| C22' | 3810(2) | 2924(4)  | 3708(2) | 37(1)  |
| C23' | 4107(2) | 2190(4)  | 3908(2) | 39(1)  |



|      |         |         |         |        |
|------|---------|---------|---------|--------|
| C24' | 3864(3) | 1432(4) | 4043(2) | 60(2)  |
| C25' | 4354(3) | 917(4)  | 4205(2) | 58(2)  |
| C26' | 4900(3) | 1353(3) | 4175(2) | 45(2)  |
| C27' | 5563(2) | 1141(3) | 4316(2) | 43(2)  |
| C28' | 5767(2) | 1654(3) | 4720(2) | 40(1)  |
| C29' | 5859(3) | 1458(4) | 5167(2) | 58(2)  |
| C30' | 6024(3) | 2186(4) | 5409(2) | 55(2)  |
| C31' | 6048(2) | 2846(3) | 5106(2) | 33(1)  |
| C32' | 6202(2) | 3726(3) | 5170(2) | 29(1)  |
| C33' | 6486(2) | 4147(3) | 5525(2) | 38(1)  |
| C34' | 6500(2) | 5016(3) | 5424(2) | 39(1)  |
| C35' | 6231(2) | 5124(3) | 5004(2) | 30(1)  |
| C36' | 6166(2) | 5893(3) | 4700(2) | 28(1)  |
| C37' | 6918(2) | 2438(3) | 2938(2) | 39(1)  |
| C38' | 7652(2) | 2766(3) | 2309(2) | 43(2)  |
| C39' | 3421(2) | 5654(3) | 3093(2) | 57(2)  |
| C40' | 4437(2) | 5495(3) | 3516(2) | 39(1)  |
| C41' | 5994(2) | 1307(3) | 3909(2) | 49(2)  |
| C42' | 5605(3) | 187(3)  | 4437(2) | 62(2)  |
| C43' | 6193(2) | 6695(3) | 5001(2) | 47(2)  |
| C44' | 5534(2) | 5883(3) | 4440(2) | 35(1)  |
| C1C  | 9355(2) | 2095(3) | 2407(2) | 35(1)  |
| N1A  | 6275(2) | 7009(3) | 2771(2) | 43(1)  |
| C1A  | 6008(3) | 6899(4) | 3244(2) | 65(2)  |
| C2A  | 5767(3) | 7719(4) | 3459(2) | 94(3)  |
| C3A  | 6813(2) | 7630(3) | 2780(2) | 38(1)  |
| C4A  | 7334(2) | 7410(3) | 3107(2) | 54(2)  |
| C5A  | 6491(3) | 6136(3) | 2633(2) | 58(2)  |
| C6A  | 6811(3) | 6086(4) | 2177(2) | 90(2)  |
| C7A  | 5799(2) | 7374(3) | 2435(2) | 55(2)  |
| C8A  | 5208(3) | 6874(5) | 2375(3) | 126(4) |

---

**Table 3.** Bond lengths [ $\text{\AA}$ ] and angles [ $^\circ$ ] for  $2[\mathbf{3}\cdot\text{C}_8\text{H}_{20}\text{NBr}]\cdot\text{CH}_2\text{Cl}_2$ .

|          |          |         |          |
|----------|----------|---------|----------|
| C11C-C1C | 1.751(4) | C6-C7   | 1.404(7) |
| C12C-C1C | 1.722(5) | C6-H6   | 0.96     |
| N1-C4    | 1.375(6) | C7-C8   | 1.376(6) |
| N1-C1    | 1.378(5) | C7-H7   | 0.96     |
| N1-H1N   | 0.90     | C8-C9   | 1.520(7) |
| N2-C5    | 1.370(5) | C9-C10  | 1.518(6) |
| N2-C8    | 1.376(5) | C9-C37  | 1.525(6) |
| N2-H2N   | 0.90     | C9-C38  | 1.537(6) |
| N3-C10   | 1.365(5) | C10-C11 | 1.372(6) |
| N3-C13   | 1.382(5) | C11-C12 | 1.404(7) |
| N3-H3N   | 0.90     | C11-H11 | 0.96     |
| N4-C14   | 1.370(5) | C12-C13 | 1.376(6) |
| N4-C17   | 1.384(6) | C12-H12 | 0.96     |
| N4-H4N   | 0.90     | C13-C14 | 1.448(6) |
| N5-C22   | 1.377(5) | C14-C15 | 1.379(6) |
| N5-C19   | 1.377(5) | C15-C16 | 1.400(6) |
| N5-H5N   | 0.90     | C15-H15 | 0.96     |
| N6-C26   | 1.381(5) | C16-C17 | 1.375(6) |
| N6-C23   | 1.383(5) | C16-H16 | 0.96     |
| N6-H6N   | 0.90     | C17-C18 | 1.504(6) |
| N7-C28   | 1.374(5) | C18-C19 | 1.527(6) |
| N7-C31   | 1.380(5) | C18-C40 | 1.544(6) |
| N7-H7N   | 0.90     | C18-C39 | 1.546(6) |
| N8-C32   | 1.370(5) | C19-C20 | 1.366(6) |
| N8-C35   | 1.378(5) | C20-C21 | 1.402(6) |
| N8-H8N   | 0.90     | C20-H20 | 0.96     |
| C1-C2    | 1.368(6) | C21-C22 | 1.363(6) |
| C1-C36   | 1.508(7) | C21-H21 | 0.96     |
| C2-C3    | 1.403(7) | C22-C23 | 1.457(6) |
| C2-H2    | 0.96     | C23-C24 | 1.370(6) |
| C3-C4    | 1.372(6) | C24-C25 | 1.405(6) |
| C3-H3    | 0.96     | C24-H24 | 0.96     |
| C4-C5    | 1.455(6) | C25-C26 | 1.372(6) |
| C5-C6    | 1.378(6) | C25-H25 | 0.96     |

|          |          |           |           |
|----------|----------|-----------|-----------|
| C26-C27  | 1.512(6) | C43-H43A  | 0.96      |
| C27-C28  | 1.515(6) | C43-H43B  | 0.96      |
| C27-C41  | 1.527(6) | C43-H43C  | 0.96      |
| C27-C42  | 1.555(6) | C44-H44A  | 0.96      |
| C28-C29  | 1.361(6) | C44-H44B  | 0.96      |
| C29-C30  | 1.405(6) | C44-H44C  | 0.96      |
| C29-H29  | 0.96     | N1B-C1B   | 1.497(6)  |
| C30-C31  | 1.368(6) | N1B-C7B   | 1.502(6)  |
| C30-H30  | 0.96     | N1B-C5BA  | 1.511(8)  |
| C31-C32  | 1.453(6) | N1B-C3BA  | 1.512(7)  |
| C32-C33  | 1.363(6) | N1B-C7BA  | 1.530(8)  |
| C33-C34  | 1.414(7) | N1B-C1BA  | 1.537(8)  |
| C33-H33  | 0.96     | N1B-C5B   | 1.546(6)  |
| C34-C35  | 1.365(6) | N1B-C3B   | 1.550(6)  |
| C34-H34  | 0.96     | C1B-C2B   | 1.507(6)  |
| C35-C36  | 1.514(6) | C1B-C1BA  | 1.516(13) |
| C36-C44  | 1.549(6) | C1B-C3BA  | 1.615(11) |
| C36-C43  | 1.549(6) | C1B-C7BA  | 1.771(16) |
| C37-H37A | 0.96     | C1B-H1BA  | 0.96      |
| C37-H37B | 0.96     | C1B-H1BB  | 0.96      |
| C37-H37C | 0.96     | C1B-H2BF  | 1.3741    |
| C38-H38A | 0.96     | C1B-H3BC  | 1.4555    |
| C38-H38B | 0.96     | C1B-H7BC  | 1.4564    |
| C38-H38C | 0.96     | C1BA-C2B  | 1.447(8)  |
| C39-H39A | 0.96     | C1BA-C5B  | 1.797(14) |
| C39-H39B | 0.96     | C1BA-H1BC | 0.96      |
| C39-H39C | 0.96     | C1BA-H1BD | 0.96      |
| C40-H40A | 0.96     | C2B-H2BD  | 0.96      |
| C40-H40B | 0.96     | C2B-H2BE  | 0.96      |
| C40-H40C | 0.96     | C2B-H2BF  | 0.96      |
| C41-H41A | 0.96     | C2B-H2BA  | 0.96      |
| C41-H41B | 0.96     | C2B-H2BB  | 0.96      |
| C41-H41C | 0.96     | C2B-H2BC  | 0.96      |
| C42-H42A | 0.96     | C3B-C4B   | 1.437(6)  |
| C42-H42B | 0.96     | C3B-H3BA  | 0.96      |
| C42-H42C | 0.96     | C3B-H3BB  | 0.96      |

|           |           |          |          |
|-----------|-----------|----------|----------|
| C3BA-C4B  | 1.485(7)  | N2'-C8'  | 1.376(5) |
| C3BA-H3BC | 0.96      | N2'-C5'  | 1.383(5) |
| C3BA-H3BD | 0.96      | N2'-H2'N | 0.90     |
| C4B-H4BD  | 0.96      | N3'-C13' | 1.366(5) |
| C4B-H4BE  | 0.96      | N3'-C10' | 1.380(5) |
| C4B-H4BF  | 0.96      | N3'-H3'N | 0.90     |
| C4B-H4BA  | 0.96      | N4'-C14' | 1.371(5) |
| C4B-H4BB  | 0.96      | N4'-C17' | 1.389(5) |
| C4B-H4BC  | 0.96      | N4'-H4'N | 0.90     |
| C5B-C6B   | 1.447(6)  | N5'-C19' | 1.383(6) |
| C5B-C5BA  | 1.467(14) | N5'-C22' | 1.387(6) |
| C5B-H5BA  | 0.96      | N5'-H5'N | 0.90     |
| C5B-H5BB  | 0.96      | N6'-C23' | 1.371(6) |
| C5BA-C6B  | 1.483(8)  | N6'-C26' | 1.388(6) |
| C5BA-H5BC | 0.96      | N6'-H6'N | 0.90     |
| C5BA-H5BD | 0.96      | N7'-C31' | 1.371(6) |
| C6B-H6BD  | 0.96      | N7'-C28' | 1.374(6) |
| C6B-H6BE  | 0.96      | N7'-H7'N | 0.90     |
| C6B-H6BF  | 0.96      | N8'-C35' | 1.372(5) |
| C6B-H6BA  | 0.96      | N8'-C32' | 1.387(5) |
| C6B-H6BB  | 0.96      | N8'-H8'N | 0.90     |
| C6B-H6BC  | 0.96      | C1'-C2'  | 1.368(6) |
| C7B-C8B   | 1.490(6)  | C1'-C36' | 1.516(6) |
| C7B-H7BA  | 0.96      | C2'-C3'  | 1.407(6) |
| C7B-H7BB  | 0.96      | C2'-H2'  | 0.96     |
| C7BA-H7BC | 0.96      | C3'-C4'  | 1.375(6) |
| C7BA-H7BD | 0.96      | C3'-H3'  | 0.96     |
| C8B-H8BD  | 0.96      | C4'-C5'  | 1.453(6) |
| C8B-H8BE  | 0.96      | C5'-C6'  | 1.359(6) |
| C8B-H8BF  | 0.96      | C6'-C7'  | 1.415(6) |
| C8B-H8BA  | 0.96      | C6'-H6'  | 0.96     |
| C8B-H8BB  | 0.96      | C7'-C8'  | 1.372(6) |
| C8B-H8BC  | 0.96      | C7'-H7'  | 0.96     |
| N1'-C1'   | 1.376(5)  | C8'-C9'  | 1.515(6) |
| N1'-C4'   | 1.382(5)  | C9'-C10' | 1.504(6) |
| N1'-H1'N  | 0.90      | C9'-C38' | 1.541(6) |

|           |          |           |          |
|-----------|----------|-----------|----------|
| C9'-C37'  | 1.554(6) | C31'-C32' | 1.439(7) |
| C10'-C11' | 1.359(6) | C32'-C33' | 1.370(6) |
| C11'-C12' | 1.399(6) | C33'-C34' | 1.405(7) |
| C11'-H11' | 0.96     | C33'-H33' | 0.96     |
| C12'-C13' | 1.367(6) | C34'-C35' | 1.363(6) |
| C12'-H12' | 0.96     | C34'-H34' | 0.96     |
| C13'-C14' | 1.452(6) | C35'-C36' | 1.510(6) |
| C14'-C15' | 1.368(6) | C36'-C44' | 1.544(6) |
| C15'-C16' | 1.410(6) | C36'-C43' | 1.546(6) |
| C15'-H15' | 0.96     | C37'-H37D | 0.96     |
| C16'-C17' | 1.359(6) | C37'-H37E | 0.96     |
| C16'-H16' | 0.96     | C37'-H37F | 0.96     |
| C17'-C18' | 1.506(6) | C38'-H38D | 0.96     |
| C18'-C19' | 1.514(7) | C38'-H38E | 0.96     |
| C18'-C40' | 1.541(6) | C38'-H38F | 0.96     |
| C18'-C39' | 1.544(6) | C39'-H39D | 0.96     |
| C19'-C20' | 1.368(6) | C39'-H39E | 0.96     |
| C20'-C21' | 1.410(7) | C39'-H39F | 0.96     |
| C20'-H20' | 0.96     | C40'-H40D | 0.96     |
| C21'-C22' | 1.380(7) | C40'-H40E | 0.96     |
| C21'-H21' | 0.96     | C40'-H40F | 0.96     |
| C22'-C23' | 1.441(7) | C41'-H41D | 0.96     |
| C23'-C24' | 1.368(7) | C41'-H41E | 0.96     |
| C24'-C25' | 1.406(7) | C41'-H41F | 0.96     |
| C24'-H24' | 0.96     | C42'-H42D | 0.96     |
| C25'-C26' | 1.364(7) | C42'-H42E | 0.96     |
| C25'-H25' | 0.96     | C42'-H42F | 0.96     |
| C26'-C27' | 1.514(7) | C43'-H43D | 0.96     |
| C27'-C28' | 1.495(7) | C43'-H43E | 0.96     |
| C27'-C41' | 1.550(6) | C43'-H43F | 0.96     |
| C27'-C42' | 1.549(6) | C44'-H44D | 0.96     |
| C28'-C29' | 1.358(7) | C44'-H44E | 0.96     |
| C29'-C30' | 1.394(7) | C44'-H44F | 0.96     |
| C29'-H29' | 0.96     | C1C-H1CA  | 0.96     |
| C30'-C31' | 1.371(7) | C1C-H1CB  | 0.96     |
| C30'-H30' | 0.96     | N1A-C5A   | 1.513(6) |

|            |          |            |          |
|------------|----------|------------|----------|
| N1A-C3A    | 1.517(5) | C4A-H4AC   | 0.96     |
| N1A-C7A    | 1.520(6) | C5A-C6A    | 1.522(8) |
| N1A-C1A    | 1.523(6) | C5A-H5AA   | 0.96     |
| C1A-C2A    | 1.535(8) | C5A-H5AB   | 0.96     |
| C1A-H1AA   | 0.96     | C6A-H6AA   | 0.96     |
| C1A-H1AB   | 0.96     | C6A-H6AB   | 0.96     |
| C2A-H2AA   | 0.96     | C6A-H6AC   | 0.96     |
| C2A-H2AB   | 0.96     | C7A-C8A    | 1.503(7) |
| C2A-H2AC   | 0.96     | C7A-H7AA   | 0.96     |
| C3A-C4A    | 1.499(6) | C7A-H7AB   | 0.96     |
| C3A-H3AA   | 0.96     | C8A-H8AA   | 0.96     |
| C3A-H3AB   | 0.96     | C8A-H8AB   | 0.96     |
| C4A-H4AA   | 0.96     | C8A-H8AC   | 0.96     |
| C4A-H4AB   | 0.96     |            |          |
| C4-N1-C1   | 110.8(4) | C32-N8-C35 | 111.5(4) |
| C4-N1-H1N  | 124.8    | C32-N8-H8N | 124.5    |
| C1-N1-H1N  | 124.4    | C35-N8-H8N | 124.0    |
| C5-N2-C8   | 110.7(4) | C2-C1-N1   | 105.8(5) |
| C5-N2-H2N  | 124.8    | C2-C1-C36  | 131.6(5) |
| C8-N2-H2N  | 124.5    | N1-C1-C36  | 122.5(5) |
| C10-N3-C13 | 111.7(4) | C1-C2-C3   | 109.1(5) |
| C10-N3-H3N | 124.1    | C1-C2-H2   | 124.7    |
| C13-N3-H3N | 124.2    | C3-C2-H2   | 126.3    |
| C14-N4-C17 | 110.9(4) | C4-C3-C2   | 107.7(5) |
| C14-N4-H4N | 124.4    | C4-C3-H3   | 125.3    |
| C17-N4-H4N | 124.7    | C2-C3-H3   | 126.9    |
| C22-N5-C19 | 110.4(4) | C3-C4-N1   | 106.6(5) |
| C22-N5-H5N | 124.6    | C3-C4-C5   | 130.4(5) |
| C19-N5-H5N | 125.0    | N1-C4-C5   | 123.0(4) |
| C26-N6-C23 | 110.5(4) | N2-C5-C6   | 107.2(4) |
| C26-N6-H6N | 124.4    | N2-C5-C4   | 122.9(4) |
| C23-N6-H6N | 125.1    | C6-C5-C4   | 129.9(5) |
| C28-N7-C31 | 111.1(4) | C5-C6-C7   | 107.1(5) |
| C28-N7-H7N | 124.4    | C5-C6-H6   | 126.5    |
| C31-N7-H7N | 124.5    | C7-C6-H6   | 126.4    |

|             |          |             |          |
|-------------|----------|-------------|----------|
| C8-C7-C6    | 109.0(5) | C17-C18-C19 | 111.4(4) |
| C8-C7-H7    | 124.3    | C17-C18-C40 | 108.6(4) |
| C6-C7-H7    | 126.7    | C19-C18-C40 | 108.4(4) |
| N2-C8-C7    | 105.9(5) | C17-C18-C39 | 110.5(4) |
| N2-C8-C9    | 121.9(4) | C19-C18-C39 | 109.2(4) |
| C7-C8-C9    | 132.1(5) | C40-C18-C39 | 108.7(4) |
| C10-C9-C8   | 109.8(4) | C20-C19-N5  | 106.1(4) |
| C10-C9-C37  | 108.9(4) | C20-C19-C18 | 132.4(5) |
| C8-C9-C37   | 108.9(4) | N5-C19-C18  | 121.4(4) |
| C10-C9-C38  | 109.7(4) | C19-C20-C21 | 108.8(4) |
| C8-C9-C38   | 110.5(4) | C19-C20-H20 | 124.8    |
| C37-C9-C38  | 109.1(4) | C21-C20-H20 | 126.4    |
| N3-C10-C11  | 106.0(5) | C22-C21-C20 | 108.0(4) |
| N3-C10-C9   | 122.4(4) | C22-C21-H21 | 125.3    |
| C11-C10-C9  | 131.4(5) | C20-C21-H21 | 126.7    |
| C10-C11-C12 | 108.4(5) | C21-C22-N5  | 106.7(4) |
| C10-C11-H11 | 125.1    | C21-C22-C23 | 130.7(4) |
| C12-C11-H11 | 126.4    | N5-C22-C23  | 122.5(4) |
| C13-C12-C11 | 108.4(5) | C24-C23-N6  | 106.5(4) |
| C13-C12-H12 | 125.6    | C24-C23-C22 | 130.8(4) |
| C11-C12-H12 | 125.9    | N6-C23-C22  | 122.3(4) |
| C12-C13-N3  | 105.4(5) | C23-C24-C25 | 108.2(4) |
| C12-C13-C14 | 130.8(5) | C23-C24-H24 | 125.5    |
| N3-C13-C14  | 123.7(4) | C25-C24-H24 | 126.4    |
| N4-C14-C15  | 106.7(4) | C26-C25-C24 | 108.7(4) |
| N4-C14-C13  | 123.1(4) | C26-C25-H25 | 124.8    |
| C15-C14-C13 | 130.2(5) | C24-C25-H25 | 126.5    |
| C14-C15-C16 | 107.7(4) | C25-C26-N6  | 106.2(4) |
| C14-C15-H15 | 125.5    | C25-C26-C27 | 131.9(4) |
| C16-C15-H15 | 126.8    | N6-C26-C27  | 121.8(4) |
| C17-C16-C15 | 109.1(5) | C26-C27-C28 | 108.4(4) |
| C17-C16-H16 | 125.3    | C26-C27-C41 | 112.0(4) |
| C15-C16-H16 | 125.7    | C28-C27-C41 | 110.4(4) |
| C16-C17-N4  | 105.7(4) | C26-C27-C42 | 108.7(4) |
| C16-C17-C18 | 132.0(5) | C28-C27-C42 | 108.5(4) |
| N4-C17-C18  | 122.4(4) | C41-C27-C42 | 108.8(4) |

|               |          |               |       |
|---------------|----------|---------------|-------|
| C29-C28-N7    | 105.9(4) | C9-C38-H38A   | 108.7 |
| C29-C28-C27   | 133.2(4) | C9-C38-H38B   | 109.8 |
| N7-C28-C27    | 120.9(4) | H38A-C38-H38B | 109.5 |
| C28-C29-C30   | 109.1(4) | C9-C38-H38C   | 109.9 |
| C28-C29-H29   | 124.7    | H38A-C38-H38C | 109.5 |
| C30-C29-H29   | 126.2    | H38B-C38-H38C | 109.5 |
| C31-C30-C29   | 107.9(4) | C18-C39-H39A  | 109.1 |
| C31-C30-H30   | 125.1    | C18-C39-H39B  | 109.8 |
| C29-C30-H30   | 127.0    | H39A-C39-H39B | 109.5 |
| C30-C31-N7    | 106.1(4) | C18-C39-H39C  | 109.5 |
| C30-C31-C32   | 131.5(4) | H39A-C39-H39C | 109.5 |
| N7-C31-C32    | 122.4(4) | H39B-C39-H39C | 109.5 |
| C33-C32-N8    | 106.2(4) | C18-C40-H40A  | 109.1 |
| C33-C32-C31   | 130.4(4) | C18-C40-H40B  | 109.4 |
| N8-C32-C31    | 123.4(4) | H40A-C40-H40B | 109.4 |
| C32-C33-C34   | 108.2(4) | C18-C40-H40C  | 109.9 |
| C32-C33-H33   | 125.5    | H40A-C40-H40C | 109.5 |
| C34-C33-H33   | 126.3    | H40B-C40-H40C | 109.5 |
| C35-C34-C33   | 108.4(4) | C27-C41-H41A  | 109.8 |
| C35-C34-H34   | 125.3    | C27-C41-H41B  | 109.7 |
| C33-C34-H34   | 126.2    | H41A-C41-H41B | 109.5 |
| C34-C35-N8    | 105.7(4) | C27-C41-H41C  | 108.9 |
| C34-C35-C36   | 131.9(4) | H41A-C41-H41C | 109.5 |
| N8-C35-C36    | 122.4(4) | H41B-C41-H41C | 109.5 |
| C1-C36-C35    | 110.0(4) | C27-C42-H42A  | 108.7 |
| C1-C36-C44    | 108.9(4) | C27-C42-H42B  | 109.8 |
| C35-C36-C44   | 108.5(4) | H42A-C42-H42B | 109.5 |
| C1-C36-C43    | 111.3(4) | C27-C42-H42C  | 109.9 |
| C35-C36-C43   | 110.0(4) | H42A-C42-H42C | 109.5 |
| C44-C36-C43   | 108.1(4) | H42B-C42-H42C | 109.5 |
| C9-C37-H37A   | 109.7    | C36-C43-H43A  | 109.0 |
| C9-C37-H37B   | 109.7    | C36-C43-H43B  | 110.0 |
| H37A-C37-H37B | 109.5    | H43A-C43-H43B | 109.5 |
| C9-C37-H37C   | 109.0    | C36-C43-H43C  | 109.4 |
| H37A-C37-H37C | 109.5    | H43A-C43-H43C | 109.5 |
| H37B-C37-H37C | 109.5    | H43B-C43-H43C | 109.5 |



|                |           |                |          |
|----------------|-----------|----------------|----------|
| C36-C44-H44A   | 110.1     | H2BD-C2B-H2BE  | 109.5    |
| C36-C44-H44B   | 108.4     | C1BA-C2B-H2BF  | 109.6    |
| H44A-C44-H44B  | 109.5     | H2BD-C2B-H2BF  | 109.5    |
| C36-C44-H44C   | 109.9     | H2BE-C2B-H2BF  | 109.5    |
| H44A-C44-H44C  | 109.5     | C1B-C2B-H2BA   | 110.0    |
| H44B-C44-H44C  | 109.5     | C1B-C2B-H2BB   | 109.7    |
| C1B-N1B-C7B    | 117.1(5)  | H2BF-C2B-H2BB  | 100.0    |
| C5BA-N1B-C7BA  | 119.7(7)  | H2BA-C2B-H2BB  | 109.5    |
| C3BA-N1B-C7BA  | 99.3(8)   | C1B-C2B-H2BC   | 108.8    |
| C5BA-N1B-C1BA  | 101.2(8)  | H2BA-C2B-H2BC  | 109.5    |
| C3BA-N1B-C1BA  | 109.7(8)  | H2BB-C2B-H2BC  | 109.5    |
| C7BA-N1B-C1BA  | 101.1(10) | C4B-C3B-N1B    | 118.1(5) |
| C1B-N1B-C5B    | 108.6(4)  | C4B-C3B-H3BA   | 108.0    |
| C7B-N1B-C5B    | 108.7(5)  | N1B-C3B-H3BA   | 108.2    |
| C1B-N1B-C3B    | 109.5(4)  | C7BA-C3B-H3BA  | 114.9    |
| C7B-N1B-C3B    | 105.4(4)  | C4B-C3B-H3BB   | 107.1    |
| C5B-N1B-C3B    | 107.2(5)  | C3BA-C3B-H3BB  | 106.0    |
| N1B-C1B-C2B    | 116.5(5)  | N1B-C3B-H3BB   | 107.6    |
| C1BA-C1B-C3BA  | 105.6(7)  | H3BA-C3B-H3BB  | 107.4    |
| N1B-C1B-H1BA   | 108.2     | C4B-C3BA-N1B   | 117.4(7) |
| C2B-C1B-H1BA   | 107.7     | C3B-C3BA-C1B   | 108.0(7) |
| N1B-C1B-H1BB   | 108.2     | C3B-C3BA-H3BC  | 104.7    |
| C2B-C1B-H1BB   | 108.6     | C4B-C3BA-H3BC  | 106.7    |
| H1BA-C1B-H1BB  | 107.5     | N1B-C3BA-H3BC  | 107.0    |
| C2B-C1BA-N1B   | 117.7(7)  | C4B-C3BA-H3BD  | 109.2    |
| C2B-C1BA-H1BC  | 108.3     | N1B-C3BA-H3BD  | 108.6    |
| N1B-C1BA-H1BC  | 108.1     | H3BC-C3BA-H3BD | 107.4    |
| C5B-C1BA-H1BC  | 103.9     | H1BA-C3BA-H4BC | 114.9    |
| C2B-C1BA-H1BD  | 107.2     | C3BA-C4B-H4BD  | 109.9    |
| C1B-C1BA-H1BD  | 111.2     | C3BA-C4B-H4BE  | 110.5    |
| N1B-C1BA-H1BD  | 107.8     | H4BD-C4B-H4BE  | 109.5    |
| H1BC-C1BA-H1BD | 107.3     | C3BA-C4B-H4BF  | 108.0    |
| H1BC-C1BA-H2BB | 101.6     | H4BD-C4B-H4BF  | 109.5    |
| H2BB-C1BA-H5BB | 107.4     | H4BE-C4B-H4BF  | 109.5    |
| C1BA-C2B-H2BD  | 110.3     | C3B-C4B-H4BA   | 110.8    |
| C1BA-C2B-H2BE  | 108.5     | C3B-C4B-H4BB   | 108.4    |

|                |          |                |          |
|----------------|----------|----------------|----------|
| H4BA-C4B-H4BB  | 109.5    | C5BA-C7B-C7BA  | 112.7(7) |
| C3B-C4B-H4BC   | 109.2    | C8B-C7B-H7BA   | 108.1    |
| H4BE-C4B-H4BC  | 112.4    | N1B-C7B-H7BA   | 108.8    |
| H4BA-C4B-H4BC  | 109.5    | C8B-C7B-H7BB   | 108.6    |
| H4BB-C4B-H4BC  | 109.5    | N1B-C7B-H7BB   | 108.8    |
| C6B-C5B-N1B    | 117.4(5) | H7BA-C7B-H7BB  | 107.7    |
| C6B-C5B-H5BA   | 107.7    | C8B-C7BA-N1B   | 115.7(8) |
| N1B-C5B-H5BA   | 108.1    | C8B-C7BA-H7BC  | 107.9    |
| C1BA-C5B-H5BA  | 107.0    | N1B-C7BA-H7BC  | 107.4    |
| C6B-C5B-H5BB   | 107.7    | C8B-C7BA-H7BD  | 109.0    |
| C5BA-C5B-H5BB  | 107.1    | N1B-C7BA-H7BD  | 109.0    |
| N1B-C5B-H5BB   | 108.0    | H7BC-C7BA-H7BD | 107.6    |
| H5BA-C5B-H5BB  | 107.5    | C8B-C7BA-H8BB  | 38.8     |
| C6B-C5BA-N1B   | 117.5(8) | N1B-C7BA-H8BB  | 130.8    |
| C5B-C5BA-C7B   | 109.9(8) | C7B-C7BA-H8BB  | 82.9     |
| C5B-C5BA-H5BC  | 104.8    | C1B-C7BA-H8BB  | 174.7    |
| C6B-C5BA-H5BC  | 106.8    | C3B-C7BA-H8BB  | 103.3    |
| N1B-C5BA-H5BC  | 106.9    | H1BB-C7BA-H8BB | 144.5    |
| C6B-C5BA-H5BD  | 109.1    | H7BC-C7BA-H8BB | 119.8    |
| N1B-C5BA-H5BD  | 108.7    | H7BD-C7BA-H8BB | 70.3     |
| H5BC-C5BA-H5BD | 107.4    | C8B-C7BA-H8BC  | 38.1     |
| H6BC-C5BA-H7BA | 114.3    | N1B-C7BA-H8BC  | 127.0    |
| C5BA-C6B-H6BD  | 110.3    | C7B-C7BA-H8BC  | 81.2     |
| C5BA-C6B-H6BE  | 110.2    | C1B-C7BA-H8BC  | 110.8    |
| H6BD-C6B-H6BE  | 109.5    | C3B-C7BA-H8BC  | 161.5    |
| C5BA-C6B-H6BF  | 107.9    | H1BB-C7BA-H8BC | 104.8    |
| H6BD-C6B-H6BF  | 109.5    | H7BC-C7BA-H8BC | 69.8     |
| H6BE-C6B-H6BF  | 109.5    | H7BD-C7BA-H8BC | 122.5    |
| C5B-C6B-H6BA   | 110.7    | H8BB-C7BA-H8BC | 64.4     |
| C5B-C6B-H6BB   | 108.8    | C7BA-C8B-C7B   | 66.1(6)  |
| H6BA-C6B-H6BB  | 109.5    | C7BA-C8B-H8BD  | 109.9    |
| C5B-C6B-H6BC   | 108.8    | C7B-C8B-H8BD   | 175.9    |
| H6BE-C6B-H6BC  | 111.2    | C7BA-C8B-H8BE  | 109.9    |
| H6BA-C6B-H6BC  | 109.5    | C7B-C8B-H8BE   | 73.1     |
| H6BB-C6B-H6BC  | 109.5    | H8BD-C8B-H8BE  | 109.5    |
| C8B-C7B-N1B    | 114.6(6) | C7BA-C8B-H8BF  | 108.7    |

|               |          |               |          |
|---------------|----------|---------------|----------|
| C7B-C8B-H8BF  | 72.1     | C23'-N6'-C26' | 111.5(4) |
| H8BD-C8B-H8BF | 109.5    | C23'-N6'-H6'N | 124.2    |
| H8BE-C8B-H8BF | 109.5    | C26'-N6'-H6'N | 124.4    |
| C7BA-C8B-H8BA | 176.1    | C31'-N7'-C28' | 111.8(5) |
| C7B-C8B-H8BA  | 110.4    | C31'-N7'-H7'N | 124.5    |
| H8BD-C8B-H8BA | 73.6     | C28'-N7'-H7'N | 123.8    |
| H8BE-C8B-H8BA | 69.9     | C35'-N8'-C32' | 110.2(4) |
| H8BF-C8B-H8BA | 68.1     | C35'-N8'-H8'N | 125.0    |
| C7BA-C8B-H8BB | 70.9     | C32'-N8'-H8'N | 124.9    |
| C7B-C8B-H8BB  | 109.2    | C2'-C1'-N1'   | 106.4(4) |
| H8BD-C8B-H8BB | 68.1     | C2'-C1'-C36'  | 131.6(4) |
| H8BE-C8B-H8BB | 177.6    | N1'-C1'-C36'  | 121.8(4) |
| H8BF-C8B-H8BB | 72.2     | C1'-C2'-C3'   | 108.5(4) |
| H8BA-C8B-H8BB | 109.5    | C1'-C2'-H2'   | 125.7    |
| C7BA-C8B-H8BC | 73.7     | C3'-C2'-H2'   | 125.8    |
| C7B-C8B-H8BC  | 108.7    | C4'-C3'-C2'   | 108.2(4) |
| H8BD-C8B-H8BC | 69.9     | C4'-C3'-H3'   | 125.5    |
| H8BE-C8B-H8BC | 68.8     | C2'-C3'-H3'   | 126.3    |
| H8BF-C8B-H8BC | 177.5    | C3'-C4'-N1'   | 106.1(4) |
| H8BA-C8B-H8BC | 109.5    | C3'-C4'-C5'   | 129.4(4) |
| H8BB-C8B-H8BC | 109.5    | N1'-C4'-C5'   | 124.4(4) |
| C1'-N1'-C4'   | 110.8(4) | C6'-C5'-N2'   | 106.7(4) |
| C1'-N1'-H1'N  | 124.5    | C6'-C5'-C4'   | 129.9(4) |
| C4'-N1'-H1'N  | 124.6    | N2'-C5'-C4'   | 123.5(4) |
| C8'-N2'-C5'   | 110.7(4) | C5'-C6'-C7'   | 108.2(4) |
| C8'-N2'-H2'N  | 125.0    | C5'-C6'-H6'   | 125.6    |
| C5'-N2'-H2'N  | 124.3    | C7'-C6'-H6'   | 126.2    |
| C13'-N3'-C10' | 111.0(4) | C8'-C7'-C6'   | 108.3(4) |
| C13'-N3'-H3'N | 124.3    | C8'-C7'-H7'   | 125.3    |
| C10'-N3'-H3'N | 124.7    | C6'-C7'-H7'   | 126.4    |
| C14'-N4'-C17' | 111.2(4) | C7'-C8'-N2'   | 106.2(4) |
| C14'-N4'-H4'N | 124.5    | C7'-C8'-C9'   | 131.1(4) |
| C17'-N4'-H4'N | 124.3    | N2'-C8'-C9'   | 122.5(4) |
| C19'-N5'-C22' | 111.2(4) | C10'-C9'-C8'  | 109.7(4) |
| C19'-N5'-H5'N | 124.1    | C10'-C9'-C38' | 109.0(4) |
| C22'-N5'-H5'N | 124.7    | C8'-C9'-C38'  | 108.7(4) |

|                |          |                |          |
|----------------|----------|----------------|----------|
| C10'-C9'-C37'  | 110.0(4) | C19'-C20'-C21' | 108.7(5) |
| C8'-C9'-C37'   | 111.0(4) | C19'-C20'-H20' | 125.1    |
| C38'-C9'-C37'  | 108.4(4) | C21'-C20'-H20' | 126.3    |
| C11'-C10'-N3'  | 105.9(4) | C22'-C21'-C20' | 108.5(5) |
| C11'-C10'-C9'  | 133.1(4) | C22'-C21'-H21' | 125.5    |
| N3'-C10'-C9'   | 121.0(4) | C20'-C21'-H21' | 126.0    |
| C10'-C11'-C12' | 108.7(4) | C21'-C22'-N5'  | 105.6(5) |
| C10'-C11'-H11' | 125.2    | C21'-C22'-C23' | 131.0(5) |
| C12'-C11'-H11' | 126.1    | N5'-C22'-C23'  | 123.4(4) |
| C13'-C12'-C11' | 108.3(5) | C24'-C23'-N6'  | 105.9(5) |
| C13'-C12'-H12' | 124.4    | C24'-C23'-C22' | 130.8(5) |
| C11'-C12'-H12' | 127.3    | N6'-C23'-C22'  | 123.3(5) |
| N3'-C13'-C12'  | 106.1(4) | C23'-C24'-C25' | 108.4(5) |
| N3'-C13'-C14'  | 122.7(4) | C23'-C24'-H24' | 125.3    |
| C12'-C13'-C14' | 131.2(5) | C25'-C24'-H24' | 126.2    |
| C15'-C14'-N4'  | 106.2(4) | C26'-C25'-C24' | 108.9(5) |
| C15'-C14'-C13' | 131.4(5) | C26'-C25'-H25' | 124.6    |
| N4'-C14'-C13'  | 122.4(4) | C24'-C25'-H25' | 126.4    |
| C14'-C15'-C16' | 108.0(5) | C25'-C26'-N6'  | 105.3(5) |
| C14'-C15'-H15' | 125.0    | C25'-C26'-C27' | 132.5(6) |
| C16'-C15'-H15' | 127.0    | N6'-C26'-C27'  | 122.2(4) |
| C17'-C16'-C15' | 109.0(4) | C28'-C27'-C26' | 110.8(4) |
| C17'-C16'-H16' | 124.9    | C28'-C27'-C41' | 110.5(4) |
| C15'-C16'-H16' | 126.1    | C26'-C27'-C41' | 109.0(4) |
| C16'-C17'-N4'  | 105.5(4) | C28'-C27'-C42' | 109.3(5) |
| C16'-C17'-C18' | 133.3(4) | C26'-C27'-C42' | 109.1(5) |
| N4'-C17'-C18'  | 121.3(4) | C41'-C27'-C42' | 108.0(4) |
| C17'-C18'-C19' | 110.0(4) | C29'-C28'-N7'  | 105.1(5) |
| C17'-C18'-C40' | 109.5(4) | C29'-C28'-C27' | 132.7(5) |
| C19'-C18'-C40' | 111.4(4) | N7'-C28'-C27'  | 122.3(5) |
| C17'-C18'-C39' | 108.7(4) | C28'-C29'-C30' | 109.7(5) |
| C19'-C18'-C39' | 108.7(4) | C28'-C29'-H29' | 124.7    |
| C40'-C18'-C39' | 108.4(4) | C30'-C29'-H29' | 125.6    |
| C20'-C19'-N5'  | 106.1(5) | C31'-C30'-C29' | 107.9(5) |
| C20'-C19'-C18' | 132.2(5) | C31'-C30'-H30' | 125.2    |
| N5'-C19'-C18'  | 121.7(4) | C29'-C30'-H30' | 126.9    |

|                |          |                |          |
|----------------|----------|----------------|----------|
| N7'-C31'-C30'  | 105.6(5) | C18'-C39'-H39F | 109.7    |
| N7'-C31'-C32'  | 123.0(5) | H39D-C39'-H39F | 109.5    |
| C30'-C31'-C32' | 131.4(5) | H39E-C39'-H39F | 109.5    |
| C33'-C32'-N8'  | 105.9(5) | C18'-C40'-H40D | 109.3    |
| C33'-C32'-C31' | 131.5(5) | C18'-C40'-H40E | 109.4    |
| N8'-C32'-C31'  | 122.6(5) | H40D-C40'-H40E | 109.5    |
| C32'-C33'-C34' | 108.9(5) | C18'-C40'-H40F | 109.7    |
| C32'-C33'-H33' | 124.9    | H40D-C40'-H40F | 109.5    |
| C34'-C33'-H33' | 126.2    | H40E-C40'-H40F | 109.5    |
| C35'-C34'-C33' | 107.7(5) | C27'-C41'-H41D | 108.9    |
| C35'-C34'-H34' | 125.3    | C27'-C41'-H41E | 109.5    |
| C33'-C34'-H34' | 127.0    | H41D-C41'-H41E | 109.5    |
| C34'-C35'-N8'  | 107.4(5) | C27'-C41'-H41F | 110.0    |
| C34'-C35'-C36' | 131.9(5) | H41D-C41'-H41F | 109.5    |
| N8'-C35'-C36'  | 120.4(4) | H41E-C41'-H41F | 109.5    |
| C35'-C36'-C1'  | 108.6(4) | C27'-C42'-H42D | 109.9    |
| C35'-C36'-C44' | 110.7(4) | C27'-C42'-H42E | 109.0    |
| C1'-C36'-C44'  | 111.2(4) | H42D-C42'-H42E | 109.5    |
| C35'-C36'-C43' | 108.6(4) | C27'-C42'-H42F | 109.5    |
| C1'-C36'-C43'  | 109.4(4) | H42D-C42'-H42F | 109.5    |
| C44'-C36'-C43' | 108.3(4) | H42E-C42'-H42F | 109.5    |
| C9'-C37'-H37D  | 109.3    | C36'-C43'-H43D | 109.4    |
| C9'-C37'-H37E  | 109.4    | C36'-C43'-H43E | 109.4    |
| H37D-C37'-H37E | 109.5    | H43D-C43'-H43E | 109.5    |
| C9'-C37'-H37F  | 109.8    | C36'-C43'-H43F | 109.7    |
| H37D-C37'-H37F | 109.4    | H43D-C43'-H43F | 109.5    |
| H37E-C37'-H37F | 109.5    | H43E-C43'-H43F | 109.5    |
| C9'-C38'-H38D  | 108.6    | C36'-C44'-H44D | 108.9    |
| C9'-C38'-H38E  | 110.0    | C36'-C44'-H44E | 110.2    |
| H38D-C38'-H38E | 109.5    | H44D-C44'-H44E | 109.5    |
| C9'-C38'-H38F  | 109.8    | C36'-C44'-H44F | 109.3    |
| H38D-C38'-H38F | 109.5    | H44D-C44'-H44F | 109.5    |
| H38E-C38'-H38F | 109.5    | H44E-C44'-H44F | 109.5    |
| C18'-C39'-H39D | 108.7    | Cl2C-C1C-Cl1C  | 112.0(3) |
| C18'-C39'-H39E | 110.0    | Cl2C-C1C-H1CA  | 109.6    |
| H39D-C39'-H39E | 109.4    | Cl1C-C1C-H1CA  | 109.6    |

|               |          |               |          |
|---------------|----------|---------------|----------|
| C12C-C1C-H1CB | 108.7    | H4AA-C4A-H4AB | 109.5    |
| C11C-C1C-H1CB | 108.7    | C3A-C4A-H4AC  | 108.4    |
| H1CA-C1C-H1CB | 108.2    | H4AA-C4A-H4AC | 109.5    |
| C5A-N1A-C3A   | 110.7(4) | H4AB-C4A-H4AC | 109.5    |
| C5A-N1A-C7A   | 112.2(4) | N1A-C5A-C6A   | 115.6(4) |
| C3A-N1A-C7A   | 105.5(4) | N1A-C5A-H5AA  | 107.8    |
| C5A-N1A-C1A   | 105.4(4) | C6A-C5A-H5AA  | 107.8    |
| C3A-N1A-C1A   | 111.1(4) | N1A-C5A-H5AB  | 108.6    |
| C7A-N1A-C1A   | 112.0(4) | C6A-C5A-H5AB  | 109.0    |
| N1A-C1A-C2A   | 114.6(5) | H5AA-C5A-H5AB | 107.8    |
| N1A-C1A-H1AA  | 109.0    | C5A-C6A-H6AA  | 110.8    |
| C2A-C1A-H1AA  | 109.6    | C5A-C6A-H6AB  | 109.4    |
| N1A-C1A-H1AB  | 107.9    | H6AA-C6A-H6AB | 109.5    |
| C2A-C1A-H1AB  | 107.8    | C5A-C6A-H6AC  | 108.2    |
| H1AA-C1A-H1AB | 107.7    | H6AA-C6A-H6AC | 109.5    |
| C1A-C2A-H2AA  | 109.9    | H6AB-C6A-H6AC | 109.5    |
| C1A-C2A-H2AB  | 108.4    | C8A-C7A-N1A   | 115.5(4) |
| H2AA-C2A-H2AB | 109.5    | C8A-C7A-H7AA  | 107.2    |
| C1A-C2A-H2AC  | 110.1    | N1A-C7A-H7AA  | 108.0    |
| H2AA-C2A-H2AC | 109.5    | C8A-C7A-H7AB  | 109.1    |
| H2AB-C2A-H2AC | 109.5    | N1A-C7A-H7AB  | 109.0    |
| C4A-C3A-N1A   | 114.7(4) | H7AA-C7A-H7AB | 107.8    |
| C4A-C3A-H3AA  | 107.8    | C7A-C8A-H8AA  | 111.1    |
| N1A-C3A-H3AA  | 108.7    | C7A-C8A-H8AB  | 109.6    |
| C4A-C3A-H3AB  | 109.1    | H8AA-C8A-H8AB | 109.5    |
| N1A-C3A-H3AB  | 108.6    | C7A-C8A-H8AC  | 107.7    |
| H3AA-C3A-H3AB | 107.7    | H8AA-C8A-H8AC | 109.5    |
| C3A-C4A-H4AA  | 110.4    | H8AB-C8A-H8AC | 109.5    |
| C3A-C4A-H4AB  | 109.6    |               |          |

---

**Table 4.** Anisotropic displacement parameters ( $\text{\AA}^2 \times 10^3$ ) for  $2[\mathbf{3}\cdot\text{C}_8\text{H}_{20}\text{NBr}]\cdot\text{CH}_2\text{Cl}_2$ . The anisotropic displacement factor exponent takes the form:  $-2\pi^2[h^2 a^{*2}U^{11} + \dots + 2 h k a^* b^* U^{12}]$ .

|      | $U^{11}$ | $U^{22}$ | $U^{33}$ | $U^{23}$ | $U^{13}$ | $U^{12}$ |
|------|----------|----------|----------|----------|----------|----------|
| Br1  | 23(1)    | 27(1)    | 28(1)    | 5(1)     | -3(1)    | -4(1)    |
| Cl1C | 56(1)    | 37(1)    | 39(1)    | 3(1)     | 2(1)     | -4(1)    |
| Cl2C | 138(2)   | 44(1)    | 38(1)    | 1(1)     | 17(1)    | -7(1)    |
| N1   | 35(2)    | 22(2)    | 26(3)    | 11(2)    | 0(2)     | 3(2)     |
| N2   | 33(2)    | 29(2)    | 21(2)    | 5(2)     | -10(2)   | 0(2)     |
| N3   | 20(2)    | 29(2)    | 37(3)    | 1(2)     | -4(2)    | -4(2)    |
| N4   | 17(2)    | 28(2)    | 36(3)    | 7(2)     | 5(2)     | 3(2)     |
| N5   | 33(2)    | 41(3)    | 17(2)    | -4(2)    | -1(2)    | 9(2)     |
| N6   | 32(2)    | 22(2)    | 22(3)    | 5(2)     | -4(2)    | 7(2)     |
| N7   | 16(2)    | 23(2)    | 38(3)    | 1(2)     | -2(2)    | -2(2)    |
| N8   | 24(2)    | 16(2)    | 41(3)    | 3(2)     | 4(2)     | -6(2)    |
| C1   | 24(3)    | 24(3)    | 46(4)    | 1(3)     | 8(3)     | 7(2)     |
| C2   | 39(3)    | 30(3)    | 45(4)    | 20(3)    | 11(3)    | 14(3)    |
| C3   | 44(3)    | 39(3)    | 38(4)    | 18(3)    | 11(3)    | 14(3)    |
| C4   | 25(3)    | 40(3)    | 23(3)    | 10(3)    | 1(2)     | 11(3)    |
| C5   | 22(3)    | 36(3)    | 30(3)    | 7(3)     | -4(2)    | 6(2)     |
| C6   | 46(3)    | 49(4)    | 35(4)    | 2(3)     | -11(3)   | 2(3)     |
| C7   | 52(4)    | 52(4)    | 31(4)    | -9(3)    | -21(3)   | 5(3)     |
| C8   | 28(3)    | 41(3)    | 36(4)    | -11(3)   | -10(3)   | 1(3)     |
| C9   | 38(3)    | 34(3)    | 38(4)    | -9(3)    | -5(3)    | -3(3)    |
| C10  | 34(3)    | 27(3)    | 35(4)    | -5(3)    | -13(3)   | -5(2)    |
| C11  | 28(3)    | 64(4)    | 63(5)    | -12(4)   | -13(3)   | -20(3)   |
| C12  | 28(3)    | 59(4)    | 63(5)    | 4(4)     | 0(3)     | -20(3)   |
| C13  | 16(3)    | 29(3)    | 42(4)    | 13(3)    | -2(3)    | -1(2)    |
| C14  | 18(3)    | 28(3)    | 39(4)    | 11(3)    | 0(3)     | 3(2)     |
| C15  | 18(3)    | 42(3)    | 50(4)    | 14(3)    | 2(3)     | 1(3)     |
| C16  | 22(3)    | 43(3)    | 38(4)    | 14(3)    | 11(3)    | 4(2)     |
| C17  | 26(3)    | 32(3)    | 30(3)    | 6(3)     | 1(2)     | 11(2)    |
| C18  | 33(3)    | 34(3)    | 34(3)    | -6(3)    | 4(3)     | 5(3)     |

|      |       |       |       |        |        |        |
|------|-------|-------|-------|--------|--------|--------|
| C19  | 28(3) | 33(3) | 24(3) | 3(3)   | -1(2)  | 0(2)   |
| C20  | 40(3) | 38(3) | 24(3) | -1(3)  | 3(3)   | -6(3)  |
| C21  | 37(3) | 45(3) | 22(3) | 4(3)   | -16(3) | -3(3)  |
| C22  | 20(3) | 27(3) | 28(3) | 10(3)  | -8(2)  | -1(2)  |
| C23  | 27(3) | 23(3) | 23(3) | 8(2)   | -6(2)  | -1(2)  |
| C24  | 34(3) | 26(3) | 29(3) | 9(2)   | -1(3)  | 2(2)   |
| C25  | 35(3) | 26(3) | 38(4) | 7(3)   | 1(3)   | 6(2)   |
| C26  | 30(3) | 19(3) | 34(3) | 2(3)   | 3(3)   | 3(2)   |
| C27  | 34(3) | 23(3) | 32(3) | 3(3)   | -5(3)  | 5(2)   |
| C28  | 30(3) | 31(3) | 19(3) | 2(2)   | 1(2)   | 7(3)   |
| C29  | 28(3) | 36(3) | 37(4) | 3(3)   | 5(3)   | 6(3)   |
| C30  | 21(3) | 38(3) | 33(3) | -4(3)  | 2(2)   | -2(2)  |
| C31  | 26(3) | 24(3) | 23(3) | -3(2)  | 4(2)   | -2(2)  |
| C32  | 23(3) | 22(3) | 30(3) | -4(2)  | 6(2)   | -8(2)  |
| C33  | 32(3) | 26(3) | 68(4) | 1(3)   | 15(3)  | -12(3) |
| C34  | 47(4) | 23(3) | 81(5) | 4(3)   | 21(3)  | -5(3)  |
| C35  | 39(3) | 17(3) | 40(4) | -2(2)  | 6(3)   | -4(2)  |
| C36  | 41(3) | 14(3) | 52(4) | 9(3)   | 9(3)   | 6(2)   |
| C37  | 57(4) | 33(3) | 61(4) | -11(3) | -20(3) | -8(3)  |
| C38  | 35(3) | 36(3) | 40(4) | -6(3)  | -7(3)  | 7(3)   |
| C39  | 43(3) | 27(3) | 57(4) | 2(3)   | -7(3)  | 6(3)   |
| C40  | 50(4) | 62(4) | 51(4) | -15(3) | 7(3)   | 15(3)  |
| C41  | 53(3) | 24(3) | 41(4) | 0(3)   | -5(3)  | 0(3)   |
| C42  | 64(4) | 35(3) | 52(4) | 14(3)  | 13(3)  | 21(3)  |
| C43  | 45(3) | 33(3) | 43(4) | -5(3)  | 12(3)  | 4(3)   |
| C44  | 62(4) | 18(3) | 83(5) | 7(3)   | 8(3)   | 7(3)   |
| N1B  | 23(2) | 61(3) | 38(3) | 13(2)  | 15(2)  | 14(2)  |
| C1B  | 46(4) | 40(4) | 52(5) | 8(4)   | 6(4)   | 7(4)   |
| C1BA | 39(7) | 38(7) | 43(7) | 1(6)   | 2(6)   | 9(6)   |
| C2B  | 35(3) | 96(4) | 76(4) | -8(4)  | 2(3)   | -2(3)  |
| C3B  | 48(4) | 46(4) | 43(5) | 0(4)   | 12(4)  | 0(4)   |
| C3BA | 24(6) | 25(6) | 20(6) | 2(5)   | -5(5)  | 6(5)   |
| C4B  | 45(3) | 62(4) | 94(5) | 21(4)  | -11(3) | -2(3)  |
| C5B  | 41(4) | 46(4) | 50(5) | 1(4)   | 10(4)  | 3(4)   |
| C5BA | 43(7) | 47(8) | 57(8) | 23(6)  | -3(6)  | -3(6)  |
| C6B  | 63(4) | 69(4) | 94(5) | -5(4)  | 15(3)  | 14(3)  |



|      |        |        |       |        |        |        |
|------|--------|--------|-------|--------|--------|--------|
| C7B  | 45(4)  | 75(5)  | 47(5) | 19(4)  | -3(4)  | 2(4)   |
| C7BA | 54(8)  | 74(9)  | 64(9) | 4(6)   | -3(6)  | 4(6)   |
| C8B  | 112(5) | 141(6) | 90(5) | -14(5) | 29(4)  | 29(4)  |
| Br2  | 23(1)  | 31(1)  | 29(1) | 2(1)   | 2(1)   | -5(1)  |
| N1'  | 23(2)  | 22(2)  | 33(3) | -3(2)  | 6(2)   | -7(2)  |
| N2'  | 16(2)  | 24(2)  | 30(3) | 2(2)   | 5(2)   | -3(2)  |
| N3'  | 26(2)  | 38(2)  | 21(2) | -3(2)  | 0(2)   | 5(2)   |
| N4'  | 20(2)  | 49(3)  | 30(3) | -1(2)  | -8(2)  | 3(2)   |
| N5'  | 18(2)  | 51(3)  | 36(3) | -10(2) | 3(2)   | -10(2) |
| N6'  | 35(3)  | 45(3)  | 40(3) | -5(2)  | 12(2)  | -17(2) |
| N7'  | 39(3)  | 32(3)  | 34(3) | 11(2)  | 5(2)   | 1(2)   |
| N8'  | 30(2)  | 38(3)  | 22(3) | 0(2)   | -1(2)  | -5(2)  |
| C1'  | 29(3)  | 29(3)  | 24(3) | -5(2)  | 4(2)   | 3(2)   |
| C2'  | 34(3)  | 30(3)  | 34(3) | -7(3)  | -1(3)  | -12(3) |
| C3'  | 25(3)  | 36(3)  | 39(4) | -7(3)  | 6(3)   | -6(2)  |
| C4'  | 22(3)  | 25(3)  | 25(3) | -1(2)  | 1(2)   | -3(2)  |
| C5'  | 18(3)  | 23(3)  | 25(3) | 3(2)   | -2(2)  | -4(2)  |
| C6'  | 27(3)  | 36(3)  | 35(3) | -10(3) | 5(3)   | -11(2) |
| C7'  | 18(3)  | 50(3)  | 39(4) | -2(3)  | 7(2)   | -4(3)  |
| C8'  | 19(3)  | 28(3)  | 30(3) | -4(2)  | 6(2)   | 7(2)   |
| C9'  | 24(3)  | 32(3)  | 32(3) | -8(3)  | 2(2)   | 2(2)   |
| C10' | 20(3)  | 37(3)  | 35(4) | -12(3) | 6(2)   | 2(2)   |
| C11' | 29(3)  | 93(5)  | 24(4) | -9(3)  | 8(3)   | 17(3)  |
| C12' | 44(4)  | 93(5)  | 16(3) | -4(3)  | 0(3)   | 10(3)  |
| C13' | 26(3)  | 43(3)  | 23(3) | -4(3)  | -6(3)  | 3(2)   |
| C14' | 33(3)  | 41(3)  | 21(3) | -5(3)  | 0(3)   | 6(3)   |
| C15' | 49(4)  | 67(4)  | 26(3) | 4(3)   | -8(3)  | 22(3)  |
| C16' | 38(3)  | 67(4)  | 40(4) | -11(3) | -13(3) | 30(3)  |
| C17' | 28(3)  | 40(3)  | 32(4) | -1(3)  | -8(3)  | 7(3)   |
| C18' | 22(3)  | 56(4)  | 36(4) | -9(3)  | -5(3)  | 8(3)   |
| C19' | 22(3)  | 60(4)  | 29(3) | -14(3) | -3(3)  | 3(3)   |
| C20' | 22(3)  | 84(5)  | 55(4) | -11(4) | -1(3)  | 0(3)   |
| C21' | 23(3)  | 81(5)  | 54(4) | -16(4) | 1(3)   | -20(3) |
| C22' | 29(3)  | 55(4)  | 27(3) | -7(3)  | 3(2)   | -16(3) |
| C23' | 35(3)  | 47(4)  | 35(4) | -7(3)  | 12(3)  | -21(3) |
| C24' | 45(4)  | 80(5)  | 56(4) | 1(4)   | 8(3)   | -31(4) |

|      |        |        |        |        |        |        |
|------|--------|--------|--------|--------|--------|--------|
| C25' | 67(4)  | 47(4)  | 59(5)  | 1(3)   | 13(4)  | -24(4) |
| C26' | 55(4)  | 35(3)  | 44(4)  | 0(3)   | 22(3)  | -21(3) |
| C27' | 50(4)  | 32(3)  | 47(4)  | 9(3)   | 21(3)  | 1(3)   |
| C28' | 52(4)  | 32(3)  | 35(4)  | 3(3)   | 11(3)  | -7(3)  |
| C29' | 78(5)  | 40(4)  | 55(5)  | 17(4)  | 4(4)   | -8(3)  |
| C30' | 72(4)  | 59(4)  | 33(4)  | 17(4)  | 7(3)   | -9(4)  |
| C31' | 31(3)  | 46(4)  | 23(3)  | 2(3)   | 3(2)   | 0(3)   |
| C32' | 25(3)  | 39(3)  | 24(3)  | 5(3)   | 8(2)   | 5(3)   |
| C33' | 31(3)  | 55(4)  | 29(4)  | 1(3)   | 1(3)   | 16(3)  |
| C34' | 33(3)  | 55(4)  | 29(4)  | -13(3) | 0(3)   | 9(3)   |
| C35' | 23(3)  | 36(3)  | 29(3)  | -8(3)  | 6(2)   | 0(2)   |
| C36' | 26(3)  | 31(3)  | 27(3)  | -7(3)  | 1(2)   | -2(2)  |
| C37' | 34(3)  | 33(3)  | 49(4)  | -9(3)  | -1(3)  | 2(2)   |
| C38' | 36(3)  | 50(4)  | 45(4)  | -20(3) | 6(3)   | 3(3)   |
| C39' | 39(3)  | 72(4)  | 61(5)  | -8(4)  | 0(3)   | 21(3)  |
| C40' | 38(3)  | 45(3)  | 34(3)  | -6(3)  | 3(3)   | 10(3)  |
| C41' | 64(4)  | 34(3)  | 51(4)  | 7(3)   | 22(3)  | -2(3)  |
| C42' | 92(5)  | 27(3)  | 69(5)  | 9(3)   | 34(4)  | -6(3)  |
| C43' | 54(4)  | 43(3)  | 45(4)  | -14(3) | 9(3)   | 0(3)   |
| C44' | 35(3)  | 33(3)  | 39(4)  | -1(3)  | 4(3)   | 7(2)   |
| C1C  | 32(3)  | 29(3)  | 44(3)  | 1(3)   | 3(2)   | 4(3)   |
| N1A  | 42(3)  | 38(3)  | 47(3)  | 21(2)  | -9(2)  | -8(2)  |
| C1A  | 60(4)  | 73(5)  | 64(5)  | 50(4)  | 8(4)   | -11(4) |
| C2A  | 98(6)  | 106(6) | 79(6)  | 37(5)  | 36(5)  | 42(5)  |
| C3A  | 44(3)  | 20(3)  | 51(4)  | 3(3)   | 11(3)  | -9(3)  |
| C4A  | 39(3)  | 50(4)  | 73(5)  | 7(3)   | -11(3) | -9(3)  |
| C5A  | 66(4)  | 24(3)  | 84(5)  | 10(3)  | -31(4) | -6(3)  |
| C6A  | 156(7) | 46(4)  | 68(5)  | -12(4) | -23(5) | 31(4)  |
| C7A  | 56(4)  | 55(4)  | 52(4)  | 23(3)  | -15(3) | 0(3)   |
| C8A  | 87(6)  | 109(7) | 177(9) | 59(6)  | -85(6) | -36(5) |

---

**Table 5.** Hydrogen coordinates ( $\times 10^4$ ) and isotropic displacement parameters ( $\text{\AA}^2 \times 10^3$ ) for  $2[\mathbf{3} \cdot \text{C}_8\text{H}_{20}\text{NBr}] \cdot \text{CH}_2\text{Cl}_2$ .

|      | x     | y    | z     | U(eq) |
|------|-------|------|-------|-------|
| H1N  | 10667 | 1720 | 1626  | 33    |
| H2N  | 10948 | 3081 | 1816  | 33    |
| H3N  | 11428 | 3788 | 1181  | 35    |
| H4N  | 11433 | 2963 | 534   | 32    |
| H5N  | 10542 | 3298 | 116   | 37    |
| H6N  | 9643  | 3749 | 484   | 31    |
| H7N  | 9176  | 3018 | 1134  | 31    |
| H8N  | 9603  | 1723 | 1252  | 32    |
| H2   | 10373 | -245 | 2429  | 46    |
| H3   | 10897 | 920  | 2900  | 48    |
| H6   | 11601 | 2390 | 3040  | 52    |
| H7   | 11893 | 3929 | 2896  | 55    |
| H11  | 12787 | 5087 | 1780  | 62    |
| H12  | 13180 | 4508 | 1034  | 60    |
| H15  | 13061 | 3876 | 148   | 44    |
| H16  | 12585 | 3026 | -504  | 41    |
| H20  | 10654 | 2633 | -1179 | 41    |
| H21  | 9705  | 3578 | -1090 | 42    |
| H24  | 9010  | 4869 | -647  | 35    |
| H25  | 8340  | 5320 | 14    | 40    |
| H29  | 7436  | 3700 | 875   | 40    |
| H30  | 7453  | 2125 | 1067  | 37    |
| H33  | 7971  | 598  | 1371  | 50    |
| H34  | 8831  | -484 | 1530  | 60    |
| H37A | 12149 | 5143 | 2439  | 76    |
| H37B | 11791 | 5828 | 2149  | 76    |
| H37C | 11465 | 5389 | 2559  | 76    |
| H38A | 10706 | 4453 | 1604  | 55    |

|      |       |       |      |     |
|------|-------|-------|------|-----|
| H38B | 10575 | 4970  | 2047 | 55  |
| H38C | 10901 | 5409  | 1637 | 55  |
| H39A | 10941 | 1790  | 251  | 64  |
| H39B | 10831 | 1200  | -173 | 64  |
| H39C | 11478 | 1200  | 86   | 64  |
| H40A | 11804 | 2301  | -941 | 81  |
| H40B | 12008 | 1515  | -648 | 81  |
| H40C | 11362 | 1515  | -906 | 81  |
| H41A | 9510  | 4315  | 1229 | 59  |
| H41B | 9354  | 5283  | 1195 | 59  |
| H41C | 9014  | 4712  | 1549 | 59  |
| H42A | 7829  | 5100  | 717  | 75  |
| H42B | 7981  | 5200  | 1239 | 75  |
| H42C | 8320  | 5771  | 885  | 75  |
| H43A | 10507 | 959   | 991  | 60  |
| H43B | 10900 | 135   | 1072 | 60  |
| H43C | 10282 | 98    | 779  | 60  |
| H44A | 9865  | -928  | 1810 | 81  |
| H44B | 9891  | -1048 | 1281 | 81  |
| H44C | 10510 | -1012 | 1574 | 81  |
| H1BA | 8297  | 2106  | 5098 | 55  |
| H1BB | 8478  | 1810  | 4616 | 55  |
| H1BC | 7331  | 2877  | 4462 | 48  |
| H1BD | 7447  | 2884  | 4984 | 48  |
| H2BD | 7123  | 1595  | 4761 | 104 |
| H2BE | 7686  | 1531  | 4433 | 104 |
| H2BF | 7804  | 1538  | 4961 | 104 |
| H2BA | 7553  | 1180  | 4820 | 104 |
| H2BB | 7250  | 2073  | 4887 | 104 |
| H2BC | 7434  | 1773  | 4399 | 104 |
| H3BA | 8986  | 3870  | 4549 | 55  |
| H3BB | 9175  | 2935  | 4477 | 55  |
| H3BC | 8823  | 2212  | 4952 | 27  |
| H3BD | 8449  | 2738  | 5295 | 27  |
| H4BD | 9491  | 3050  | 5357 | 101 |
| H4BE | 9500  | 3319  | 4844 | 101 |

|      |      |      |      |     |
|------|------|------|------|-----|
| H4BF | 9120 | 3852 | 5192 | 101 |
| H4BA | 9678 | 3459 | 5090 | 101 |
| H4BB | 9037 | 3677 | 5306 | 101 |
| H4BC | 9228 | 2729 | 5233 | 101 |
| H5BA | 8025 | 3464 | 5275 | 55  |
| H5BB | 7460 | 3486 | 4938 | 55  |
| H5BC | 7724 | 3959 | 4344 | 59  |
| H5BD | 8422 | 4203 | 4359 | 59  |
| H6BD | 7861 | 5082 | 4821 | 113 |
| H6BE | 7629 | 4299 | 5098 | 113 |
| H6BF | 8336 | 4547 | 5114 | 113 |
| H6BA | 7726 | 4815 | 5148 | 113 |
| H6BB | 8398 | 4665 | 4966 | 113 |
| H6BC | 7826 | 4688 | 4626 | 113 |
| H7BA | 8185 | 3828 | 4089 | 67  |
| H7BB | 7598 | 3269 | 4142 | 67  |
| H7BC | 8370 | 1911 | 4323 | 77  |
| H7BD | 8943 | 2493 | 4267 | 77  |
| H8BD | 8448 | 2289 | 3589 | 171 |
| H8BE | 7832 | 2656 | 3786 | 171 |
| H8BF | 8412 | 3245 | 3729 | 171 |
| H8BA | 8130 | 2857 | 3506 | 171 |
| H8BB | 8725 | 2687 | 3811 | 171 |
| H8BC | 8132 | 2121 | 3864 | 171 |
| H1'N | 6471 | 4909 | 3969 | 31  |
| H2'N | 6807 | 4024 | 3384 | 28  |
| H3'N | 6006 | 3763 | 2814 | 34  |
| H4'N | 5103 | 4360 | 2980 | 40  |
| H5'N | 4549 | 3702 | 3600 | 42  |
| H6'N | 5009 | 2551 | 3931 | 48  |
| H7'N | 5865 | 2802 | 4429 | 42  |
| H8'N | 5860 | 4240 | 4578 | 36  |
| H2'  | 7317 | 6873 | 4553 | 39  |
| H3'  | 7999 | 6320 | 3924 | 40  |
| H6'  | 8308 | 5420 | 3177 | 39  |
| H7'  | 8253 | 4253 | 2576 | 42  |

|      |      |      |      |    |
|------|------|------|------|----|
| H11' | 6849 | 3442 | 1643 | 58 |
| H12' | 5790 | 4118 | 1490 | 61 |
| H15' | 4609 | 4738 | 1690 | 57 |
| H16' | 3731 | 5244 | 2195 | 58 |
| H20' | 2776 | 4177 | 3300 | 64 |
| H21' | 2853 | 2706 | 3649 | 63 |
| H24' | 3432 | 1279 | 4024 | 72 |
| H25' | 4318 | 357  | 4328 | 69 |
| H29' | 5825 | 899  | 5292 | 69 |
| H30' | 6101 | 2230 | 5731 | 66 |
| H33' | 6646 | 3883 | 5798 | 46 |
| H34' | 6669 | 5460 | 5613 | 47 |
| H37D | 6606 | 2667 | 3133 | 58 |
| H37E | 6741 | 1986 | 2759 | 58 |
| H37F | 7259 | 2225 | 3121 | 58 |
| H38D | 7799 | 3202 | 2111 | 65 |
| H38E | 7993 | 2552 | 2492 | 65 |
| H38F | 7476 | 2313 | 2130 | 65 |
| H39D | 3132 | 5381 | 2887 | 86 |
| H39E | 3218 | 5778 | 3373 | 86 |
| H39F | 3565 | 6171 | 2960 | 86 |
| H40D | 4786 | 5128 | 3577 | 59 |
| H40E | 4581 | 6012 | 3383 | 59 |
| H40F | 4234 | 5619 | 3796 | 59 |
| H41D | 5975 | 1897 | 3831 | 74 |
| H41E | 6415 | 1159 | 3994 | 74 |
| H41F | 5861 | 973  | 3652 | 74 |
| H42D | 5340 | 65   | 4688 | 93 |
| H42E | 5473 | -140 | 4177 | 93 |
| H42F | 6027 | 45   | 4519 | 93 |
| H43D | 6582 | 6709 | 5168 | 71 |
| H43E | 6159 | 7189 | 4812 | 71 |
| H43F | 5857 | 6688 | 5211 | 71 |
| H44D | 5512 | 5386 | 4252 | 53 |
| H44E | 5198 | 5877 | 4650 | 53 |
| H44F | 5501 | 6379 | 4251 | 53 |

|      |      |      |      |     |
|------|------|------|------|-----|
| H1CA | 9664 | 1692 | 2319 | 42  |
| H1CB | 8954 | 1890 | 2306 | 42  |
| H1AA | 6320 | 6650 | 3441 | 79  |
| H1AB | 5666 | 6510 | 3220 | 79  |
| H2AA | 5602 | 7601 | 3753 | 141 |
| H2AB | 6109 | 8108 | 3491 | 141 |
| H2AC | 5448 | 7966 | 3267 | 141 |
| H3AA | 6659 | 8179 | 2861 | 46  |
| H3AB | 6975 | 7669 | 2478 | 46  |
| H4AA | 7658 | 7828 | 3095 | 81  |
| H4AB | 7178 | 7383 | 3410 | 81  |
| H4AC | 7497 | 6867 | 3024 | 81  |
| H5AA | 6133 | 5773 | 2618 | 70  |
| H5AB | 6768 | 5922 | 2867 | 70  |
| H6AA | 6931 | 5514 | 2111 | 136 |
| H6AB | 6533 | 6288 | 1941 | 136 |
| H6AC | 7175 | 6439 | 2192 | 136 |
| H7AA | 5988 | 7405 | 2142 | 66  |
| H7AB | 5698 | 7941 | 2526 | 66  |
| H8AA | 4932 | 7136 | 2156 | 188 |
| H8AB | 5304 | 6310 | 2277 | 188 |
| H8AC | 5011 | 6851 | 2665 | 188 |

---

**Table 6.** Torsion angles [°] for 2[**3**·C<sub>8</sub>H<sub>20</sub>NBr]·CH<sub>2</sub>Cl<sub>2</sub>.

|                |           |                 |           |
|----------------|-----------|-----------------|-----------|
| C4-N1-C1-C2    | -0.2(5)   | C37-C9-C10-C11  | 15.6(8)   |
| C4-N1-C1-C36   | 178.5(4)  | C38-C9-C10-C11  | 134.9(6)  |
| N1-C1-C2-C3    | 0.4(5)    | N3-C10-C11-C12  | 0.4(6)    |
| C36-C1-C2-C3   | -178.2(4) | C9-C10-C11-C12  | 177.1(5)  |
| C1-C2-C3-C4    | -0.5(5)   | C10-C11-C12-C13 | -0.2(6)   |
| C2-C3-C4-N1    | 0.3(5)    | C11-C12-C13-N3  | -0.1(6)   |
| C2-C3-C4-C5    | 179.6(4)  | C11-C12-C13-C14 | 176.0(5)  |
| C1-N1-C4-C3    | -0.1(5)   | C10-N3-C13-C12  | 0.3(5)    |
| C1-N1-C4-C5    | -179.4(4) | C10-N3-C13-C14  | -176.2(4) |
| C8-N2-C5-C6    | -0.7(5)   | C17-N4-C14-C15  | -0.4(5)   |
| C8-N2-C5-C4    | 179.7(4)  | C17-N4-C14-C13  | 177.5(4)  |
| C3-C4-C5-N2    | -168.7(5) | C12-C13-C14-N4  | 174.7(5)  |
| N1-C4-C5-N2    | 10.4(7)   | N3-C13-C14-N4   | -9.8(7)   |
| C3-C4-C5-C6    | 11.7(8)   | C12-C13-C14-C15 | -7.9(9)   |
| N1-C4-C5-C6    | -169.1(5) | N3-C13-C14-C15  | 167.6(4)  |
| N2-C5-C6-C7    | 0.7(5)    | N4-C14-C15-C16  | 0.6(5)    |
| C4-C5-C6-C7    | -179.7(5) | C13-C14-C15-C16 | -177.1(4) |
| C5-C6-C7-C8    | -0.5(6)   | C14-C15-C16-C17 | -0.6(5)   |
| C5-N2-C8-C7    | 0.4(5)    | C15-C16-C17-N4  | 0.4(5)    |
| C5-N2-C8-C9    | 178.1(4)  | C15-C16-C17-C18 | 179.2(5)  |
| C6-C7-C8-N2    | 0.1(6)    | C14-N4-C17-C16  | 0.0(5)    |
| C6-C7-C8-C9    | -177.4(5) | C14-N4-C17-C18  | -179.0(4) |
| N2-C8-C9-C10   | -70.9(5)  | C16-C17-C18-C19 | -102.8(6) |
| C7-C8-C9-C10   | 106.3(6)  | N4-C17-C18-C19  | 75.8(5)   |
| N2-C8-C9-C37   | 170.0(4)  | C16-C17-C18-C40 | 16.5(7)   |
| C7-C8-C9-C37   | -12.8(8)  | N4-C17-C18-C40  | -164.9(4) |
| N2-C8-C9-C38   | 50.3(6)   | C16-C17-C18-C39 | 135.6(5)  |
| C7-C8-C9-C38   | -132.6(5) | N4-C17-C18-C39  | -45.7(6)  |
| C13-N3-C10-C11 | -0.4(5)   | C22-N5-C19-C20  | -0.9(5)   |
| C13-N3-C10-C9  | -177.5(4) | C22-N5-C19-C18  | -176.8(4) |
| C8-C9-C10-N3   | 72.7(6)   | C17-C18-C19-C20 | 127.1(5)  |
| C37-C9-C10-N3  | -168.2(4) | C40-C18-C19-C20 | 7.7(7)    |
| C38-C9-C10-N3  | -48.8(6)  | C39-C18-C19-C20 | -110.5(6) |
| C8-C9-C10-C11  | -103.5(6) | C17-C18-C19-N5  | -58.2(6)  |



|                 |           |                  |           |
|-----------------|-----------|------------------|-----------|
| C40-C18-C19-N5  | -177.6(4) | N7-C28-C29-C30   | 0.8(5)    |
| C39-C18-C19-N5  | 64.1(5)   | C27-C28-C29-C30  | 176.8(5)  |
| N5-C19-C20-C21  | 0.2(5)    | C28-C29-C30-C31  | 0.2(6)    |
| C18-C19-C20-C21 | 175.5(5)  | C29-C30-C31-N7   | -1.1(5)   |
| C19-C20-C21-C22 | 0.6(6)    | C29-C30-C31-C32  | -179.2(5) |
| C20-C21-C22-N5  | -1.1(5)   | C28-N7-C31-C30   | 1.6(5)    |
| C20-C21-C22-C23 | -177.7(4) | C28-N7-C31-C32   | 179.9(4)  |
| C19-N5-C22-C21  | 1.3(5)    | C35-N8-C32-C33   | 0.3(6)    |
| C19-N5-C22-C23  | 178.2(4)  | C35-N8-C32-C31   | -178.3(4) |
| C26-N6-C23-C24  | 0.5(5)    | C30-C31-C32-C33  | -6.8(9)   |
| C26-N6-C23-C22  | -173.2(4) | N7-C31-C32-C33   | 175.4(5)  |
| C21-C22-C23-C24 | -17.0(8)  | C30-C31-C32-N8   | 171.4(5)  |
| N5-C22-C23-C24  | 166.9(4)  | N7-C31-C32-N8    | -6.4(7)   |
| C21-C22-C23-N6  | 155.0(5)  | N8-C32-C33-C34   | 0.0(6)    |
| N5-C22-C23-N6   | -21.2(7)  | C31-C32-C33-C34  | 178.5(5)  |
| N6-C23-C24-C25  | -0.3(5)   | C32-C33-C34-C35  | -0.4(7)   |
| C22-C23-C24-C25 | 172.6(4)  | C33-C34-C35-N8   | 0.6(6)    |
| C23-C24-C25-C26 | 0.1(5)    | C33-C34-C35-C36  | 178.2(5)  |
| C24-C25-C26-N6  | 0.2(5)    | C32-N8-C35-C34   | -0.6(6)   |
| C24-C25-C26-C27 | -175.7(5) | C32-N8-C35-C36   | -178.4(4) |
| C23-N6-C26-C25  | -0.4(5)   | C2-C1-C36-C35    | 98.2(6)   |
| C23-N6-C26-C27  | 176.0(4)  | N1-C1-C36-C35    | -80.3(5)  |
| C25-C26-C27-C28 | 107.0(6)  | C2-C1-C36-C44    | -20.7(7)  |
| N6-C26-C27-C28  | -68.4(5)  | N1-C1-C36-C44    | 160.9(4)  |
| C25-C26-C27-C41 | -130.9(5) | C2-C1-C36-C43    | -139.7(5) |
| N6-C26-C27-C41  | 53.7(6)   | N1-C1-C36-C43    | 41.9(6)   |
| C25-C26-C27-C42 | -10.7(7)  | C34-C35-C36-C1   | -111.2(6) |
| N6-C26-C27-C42  | 173.9(4)  | N8-C35-C36-C1    | 66.0(6)   |
| C31-N7-C28-C29  | -1.5(5)   | C34-C35-C36-C44  | 7.9(8)    |
| C31-N7-C28-C27  | -178.1(4) | N8-C35-C36-C44   | -174.9(4) |
| C26-C27-C28-C29 | -94.9(6)  | C34-C35-C36-C43  | 125.9(6)  |
| C41-C27-C28-C29 | 142.1(5)  | N8-C35-C36-C43   | -56.9(6)  |
| C42-C27-C28-C29 | 23.0(7)   | C4'-N1'-C1'-C2'  | 0.6(5)    |
| C26-C27-C28-N7  | 80.6(5)   | C4'-N1'-C1'-C36' | -175.0(4) |
| C41-C27-C28-N7  | -42.4(6)  | N1'-C1'-C2'-C3'  | -0.3(5)   |
| C42-C27-C28-N7  | -161.5(4) | C36'-C1'-C2'-C3' | 174.8(5)  |

|                     |           |                     |           |
|---------------------|-----------|---------------------|-----------|
| C1'-C2'-C3'-C4'     | -0.2(6)   | C10'-N3'-C13'-C14'  | -178.5(4) |
| C2'-C3'-C4'-N1'     | 0.6(5)    | C11'-C12'-C13'-N3'  | 0.0(6)    |
| C2'-C3'-C4'-C5'     | 177.0(4)  | C11'-C12'-C13'-C14' | 178.3(5)  |
| C1'-N1'-C4'-C3'     | -0.8(5)   | C17'-N4'-C14'-C15'  | -0.8(6)   |
| C1'-N1'-C4'-C5'     | -177.4(4) | C17'-N4'-C14'-C13'  | 179.4(4)  |
| C8'-N2'-C5'-C6'     | -0.1(5)   | N3'-C13'-C14'-C15'  | -177.8(5) |
| C8'-N2'-C5'-C4'     | 179.2(4)  | C12'-C13'-C14'-C15' | 4.1(10)   |
| C3'-C4'-C5'-C6'     | -2.3(8)   | N3'-C13'-C14'-N4'   | 2.0(7)    |
| N1'-C4'-C5'-C6'     | 173.5(5)  | C12'-C13'-C14'-N4'  | -176.1(5) |
| C3'-C4'-C5'-N2'     | 178.5(4)  | N4'-C14'-C15'-C16'  | 0.2(6)    |
| N1'-C4'-C5'-N2'     | -5.7(7)   | C13'-C14'-C15'-C16' | -179.9(5) |
| N2'-C5'-C6'-C7'     | 0.1(5)    | C14'-C15'-C16'-C17' | 0.3(7)    |
| C4'-C5'-C6'-C7'     | -179.2(4) | C15'-C16'-C17'-N4'  | -0.8(6)   |
| C5'-C6'-C7'-C8'     | -0.1(6)   | C15'-C16'-C17'-C18' | -179.7(5) |
| C6'-C7'-C8'-N2'     | 0.0(5)    | C14'-N4'-C17'-C16'  | 1.0(6)    |
| C6'-C7'-C8'-C9'     | 175.2(5)  | C14'-N4'-C17'-C18'  | 180.0(4)  |
| C5'-N2'-C8'-C7'     | 0.0(5)    | C16'-C17'-C18'-C19' | 104.0(7)  |
| C5'-N2'-C8'-C9'     | -175.6(4) | N4'-C17'-C18'-C19'  | -74.7(6)  |
| C7'-C8'-C9'-C10'    | -99.1(6)  | C16'-C17'-C18'-C40' | -133.3(6) |
| N2'-C8'-C9'-C10'    | 75.4(5)   | N4'-C17'-C18'-C40'  | 47.9(6)   |
| C7'-C8'-C9'-C38'    | 20.0(7)   | C16'-C17'-C18'-C39' | -15.0(8)  |
| N2'-C8'-C9'-C38'    | -165.5(4) | N4'-C17'-C18'-C39'  | 166.3(4)  |
| C7'-C8'-C9'-C37'    | 139.2(5)  | C22'-N5'-C19'-C20'  | 0.5(6)    |
| N2'-C8'-C9'-C37'    | -46.4(6)  | C22'-N5'-C19'-C18'  | -177.2(4) |
| C13'-N3'-C10'-C11'  | 0.0(6)    | C17'-C18'-C19'-C20' | -104.3(6) |
| C13'-N3'-C10'-C9'   | 177.4(4)  | C40'-C18'-C19'-C20' | 134.1(6)  |
| C8'-C9'-C10'-C11'   | 108.4(6)  | C39'-C18'-C19'-C20' | 14.7(8)   |
| C38'-C9'-C10'-C11'  | -10.5(8)  | C17'-C18'-C19'-N5'  | 72.7(6)   |
| C37'-C9'-C10'-C11'  | -129.2(6) | C40'-C18'-C19'-N5'  | -48.9(6)  |
| C8'-C9'-C10'-N3'    | -68.1(5)  | C39'-C18'-C19'-N5'  | -168.3(4) |
| C38'-C9'-C10'-N3'   | 173.0(4)  | N5'-C19'-C20'-C21'  | -0.9(6)   |
| C37'-C9'-C10'-N3'   | 54.2(6)   | C18'-C19'-C20'-C21' | 176.5(5)  |
| N3'-C10'-C11'-C12'  | -0.1(6)   | C19'-C20'-C21'-C22' | 1.0(7)    |
| C9'-C10'-C11'-C12'  | -177.0(5) | C20'-C21'-C22'-N5'  | -0.6(6)   |
| C10'-C11'-C12'-C13' | 0.1(7)    | C20'-C21'-C22'-C23' | -178.8(5) |
| C10'-N3'-C13'-C12'  | 0.0(6)    | C19'-N5'-C22'-C21'  | 0.0(5)    |

|                     |           |                     |           |
|---------------------|-----------|---------------------|-----------|
| C19'-N5'-C22'-C23'  | 178.4(4)  | C28'-C29'-C30'-C31' | -1.2(7)   |
| C26'-N6'-C23'-C24'  | -0.6(6)   | C28'-N7'-C31'-C30'  | 0.2(6)    |
| C26'-N6'-C23'-C22'  | -178.9(5) | C28'-N7'-C31'-C32'  | 179.8(4)  |
| C21'-C22'-C23'-C24' | 1.1(10)   | C29'-C30'-C31'-N7'  | 0.6(6)    |
| N5'-C22'-C23'-C24'  | -176.9(5) | C29'-C30'-C31'-C32' | -179.0(5) |
| C21'-C22'-C23'-N6'  | 178.9(5)  | C35'-N8'-C32'-C33'  | -0.4(5)   |
| N5'-C22'-C23'-N6'   | 1.0(8)    | C35'-N8'-C32'-C31'  | 177.8(4)  |
| N6'-C23'-C24'-C25'  | 0.2(6)    | N7'-C31'-C32'-C33'  | -164.7(5) |
| C22'-C23'-C24'-C25' | 178.3(5)  | C30'-C31'-C32'-C33' | 14.7(9)   |
| C23'-C24'-C25'-C26' | 0.3(7)    | N7'-C31'-C32'-N8'   | 17.5(7)   |
| C24'-C25'-C26'-N6'  | -0.6(6)   | C30'-C31'-C32'-N8'  | -163.1(5) |
| C24'-C25'-C26'-C27' | 176.8(6)  | N8'-C32'-C33'-C34'  | 0.7(5)    |
| C23'-N6'-C26'-C25'  | 0.8(6)    | C31'-C32'-C33'-C34' | -177.4(4) |
| C23'-N6'-C26'-C27'  | -177.0(5) | C32'-C33'-C34'-C35' | -0.7(5)   |
| C25'-C26'-C27'-C28' | -108.5(7) | C33'-C34'-C35'-N8'  | 0.4(5)    |
| N6'-C26'-C27'-C28'  | 68.6(6)   | C33'-C34'-C35'-C36' | -173.7(4) |
| C25'-C26'-C27'-C41' | 129.7(6)  | C32'-N8'-C35'-C34'  | 0.0(5)    |
| N6'-C26'-C27'-C41'  | -53.2(6)  | C32'-N8'-C35'-C36'  | 174.9(4)  |
| C25'-C26'-C27'-C42' | 11.9(8)   | C34'-C35'-C36'-C1'  | 93.8(6)   |
| N6'-C26'-C27'-C42'  | -171.0(4) | N8'-C35'-C36'-C1'   | -79.7(5)  |
| C31'-N7'-C28'-C29'  | -0.9(6)   | C34'-C35'-C36'-C44' | -143.8(5) |
| C31'-N7'-C28'-C27'  | 177.7(4)  | N8'-C35'-C36'-C44'  | 42.7(6)   |
| C26'-C27'-C28'-C29' | 106.0(7)  | C34'-C35'-C36'-C43' | -25.1(7)  |
| C41'-C27'-C28'-C29' | -133.0(6) | N8'-C35'-C36'-C43'  | 161.4(4)  |
| C42'-C27'-C28'-C29' | -14.3(8)  | C2'-C1'-C36'-C35'   | -106.1(6) |
| C26'-C27'-C28'-N7'  | -72.2(6)  | N1'-C1'-C36'-C35'   | 68.4(5)   |
| C41'-C27'-C28'-N7'  | 48.8(6)   | C2'-C1'-C36'-C44'   | 131.8(5)  |
| C42'-C27'-C28'-N7'  | 167.5(4)  | N1'-C1'-C36'-C44'   | -53.7(6)  |
| N7'-C28'-C29'-C30'  | 1.2(6)    | C2'-C1'-C36'-C43'   | 12.3(7)   |
| C27'-C28'-C29'-C30' | -177.2(5) | N1'-C1'-C36'-C43'   | -173.2(4) |

**Table 7.** Hydrogen bonds for 2[**3**·C<sub>8</sub>H<sub>20</sub>NBr]·CH<sub>2</sub>Cl<sub>2</sub> [Å and °].

| D-H...A        | d(D-H) | d(H...A) | d(D...A) | <(DHA) |
|----------------|--------|----------|----------|--------|
| N1-H1N...Br1   | 0.90   | 2.62     | 3.492(4) | 163.6  |
| N2-H2N...Br1   | 0.90   | 2.61     | 3.511(4) | 174.6  |
| N3-H3N...Br1   | 0.90   | 2.62     | 3.511(4) | 171.4  |
| N4-H4N...Br1   | 0.90   | 2.60     | 3.493(4) | 170.5  |
| N5-H5N...Br1   | 0.90   | 2.72     | 3.558(4) | 154.7  |
| N6-H6N...Br1   | 0.90   | 2.65     | 3.542(4) | 174.2  |
| N7-H7N...Br1   | 0.90   | 2.73     | 3.608(3) | 164.6  |
| N8-H8N...Br1   | 0.90   | 2.66     | 3.552(3) | 173.6  |
| N1'-H1'N...Br2 | 0.90   | 2.55     | 3.450(4) | 172.9  |
| N2'-H2'N...Br2 | 0.90   | 2.54     | 3.430(3) | 169.0  |
| N3'-H3'N...Br2 | 0.90   | 2.66     | 3.554(4) | 177.2  |
| N4'-H4'N...Br2 | 0.90   | 2.64     | 3.536(4) | 174.2  |
| N5'-H5'N...Br2 | 0.90   | 2.54     | 3.438(4) | 175.0  |
| N6'-H6'N...Br2 | 0.90   | 2.55     | 3.448(4) | 174.1  |
| N7'-H7'N...Br2 | 0.90   | 2.65     | 3.545(4) | 175.8  |
| N8'-H8'N...Br2 | 0.90   | 2.73     | 3.583(4) | 158.5  |

**Figure 1.** View of the macrocycle-Br complex **1** in  $2[3 \cdot \text{C}_8\text{H}_{20}\text{NBr}] \cdot \text{CH}_2\text{Cl}_2$  showing the atom labeling scheme. Displacement ellipsoids are scaled to the 50% probability level. The methyl hydrogen atoms have been removed for clarity. Dashed lines are indicative of N-H $\cdots$ Br H-bonding interactions. The N $\cdots$ Br contacts range from 3.492(4)Å for N1 to 3.608(3)Å for N7. A full listing of these interactions are found in Table 7.

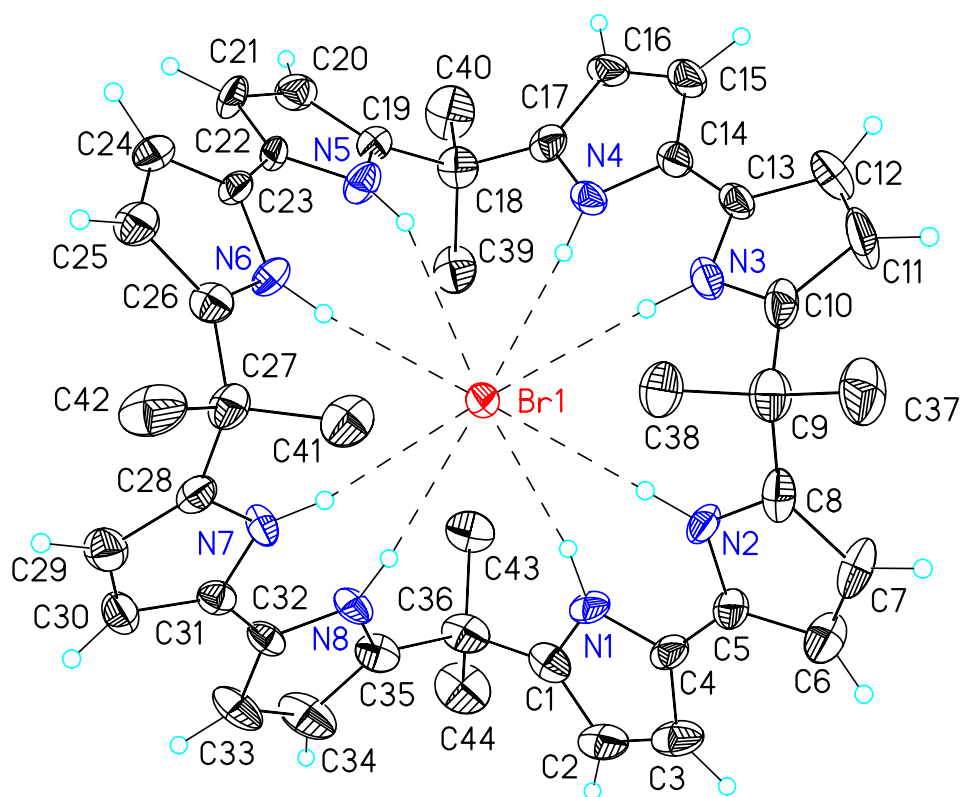

**Figure 2.** View of the macrocycle-Br complex **2** in  $2[\mathbf{3}\cdot\text{C}_8\text{H}_{20}\text{NBr}]\cdot\text{CH}_2\text{Cl}_2$  showing the atom labeling scheme. Displacement ellipsoids are scaled to the 50% probability level. The methyl hydrogen atoms have been removed for clarity. Dashed lines are indicative of N-H $\cdots$ Br H-bonding interactions. The N $\cdots$ Br contacts range from 3.430(3)Å for N2' to 3.583(4)Å for N8'. A full listing of these interactions are found in Table 7.

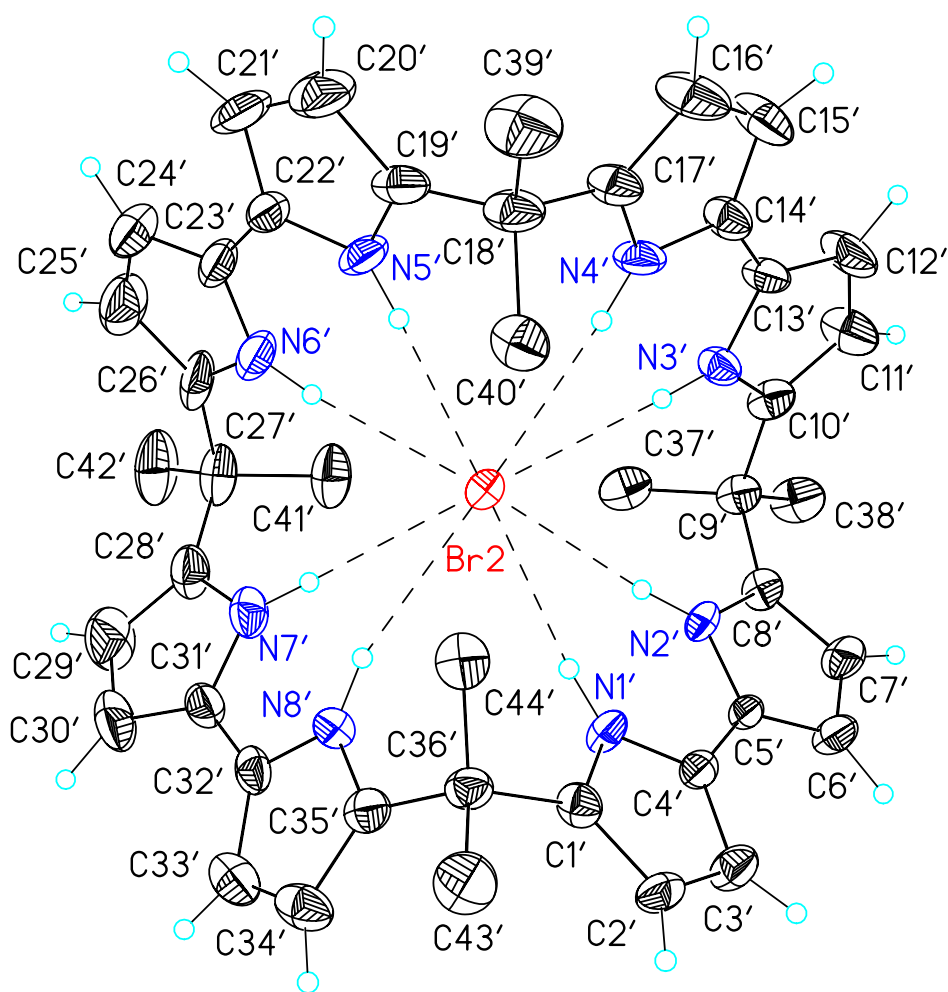

**Figure 3.** View of one cation with atom labeling scheme. Displacement ellipsoids are scaled to the 50% probability level.

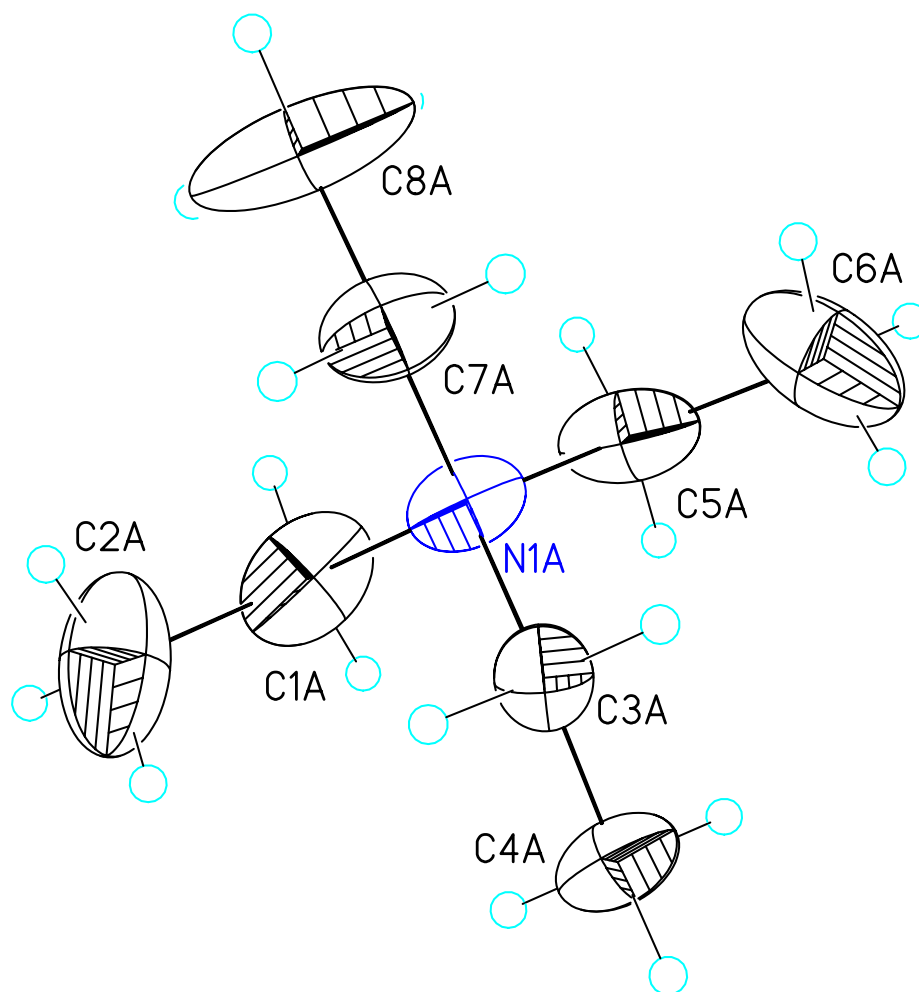

**Figure 4.** View of one cation with atom labeling scheme. Displacement ellipsoids are scaled to the 50% probability level. The methylene carbon atoms are disordered. Atoms represented by open ellipsoids have site occupancy factors of 40%.

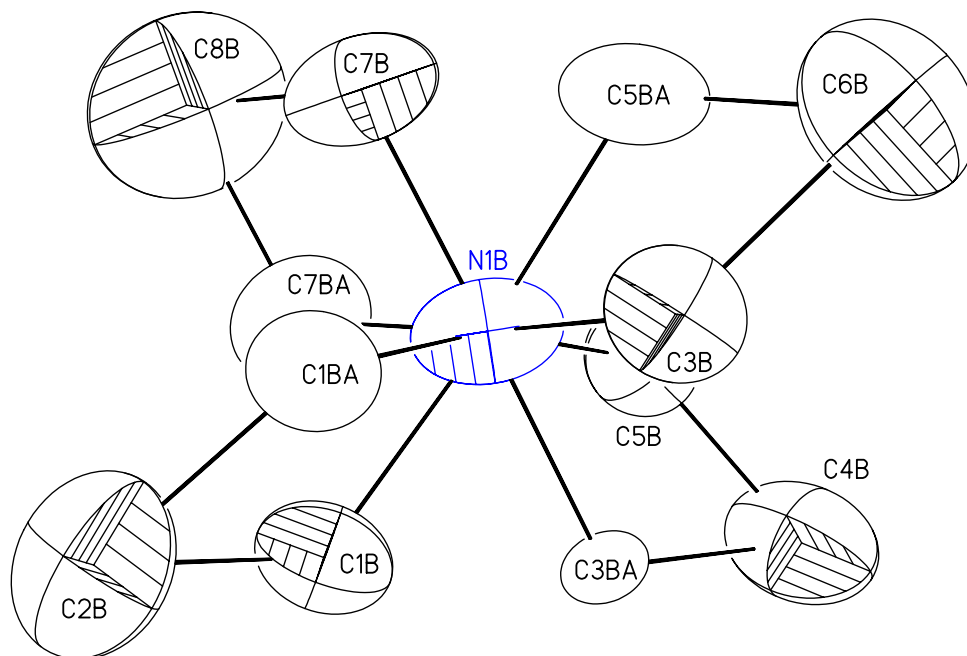



**Figure 5.** Unit cell packing diagram for  $2[3 \cdot C_8H_{20}NBr] \cdot CH_2Cl_2$ . The view is approximately down the **c** axis. Macrocycle 2 is displayed in wireframe form (near  $x = \frac{1}{2}$ ) while macrocycle 1 is shown in ball-and-stick form.

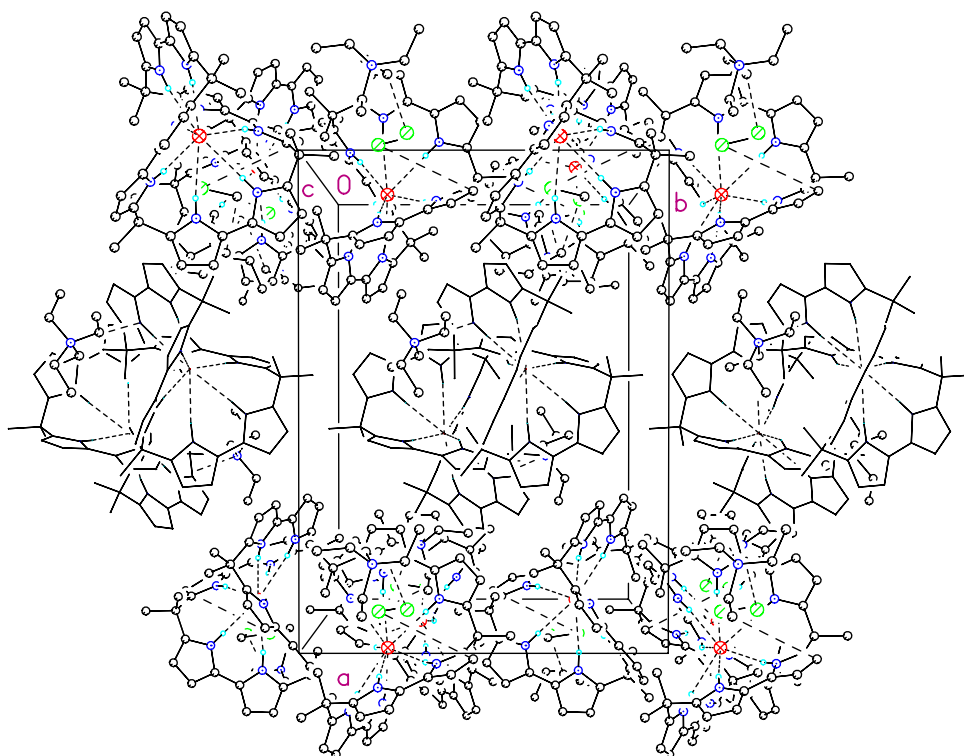

Supplement: b412737d.pdf [file b412737d.pdf]
